1 **Running head:**

2 Degraded purines contribute to N balance in Arabidopsis

3 **Corresponding author:**

4 Prof. Moshe Sagi

5 French Associates Institute for Agriculture and Biotechnology of Drylands, Blaustein Institutes for Desert  
6 Research, Sede Boqer campus, Ben-Gurion University, P.O.B. 653, Beer Sheva 84105, Israel

7 fax +972 8 6472984; e-mail [gizi@bgu.ac.il](mailto:gizi@bgu.ac.il)

8

9 **Research category:**

10 Biochemistry and Metabolism, Monitoring editors: Graham Noctor and Astrid Wingler,

11 Associated editor: Cathie Martin.

12

13 **Title:**

14 **Pre-mature senescence in the oldest leaves of low nitrate-grown *Atxdh1* mutant**  
15 **uncovers a role for purine catabolism in plant nitrogen metabolism**

16 Early senescence in nitrate starved *Atxdh1* old leaves uncovers a role for purine in N metabolism

17 **Authors:**

18 Aigerim Soltabayeva<sup>1</sup>

19 Sudhakar Srivastava<sup>1</sup>

20 Assylay Kurmanbayeva<sup>1</sup>

21 Aizat Bekturova<sup>1</sup>

22 Robert Fluhr<sup>2</sup>

23 Moshe Sagi<sup>1\*</sup>

24

25

26 **Author addresses:**

27 <sup>1</sup> Plant Stress laboratory, French Associates Institute for Agriculture and Biotechnology of Drylands,  
28 Blaustein Institutes for Desert Research, Ben-Gurion University of the Negev, Sede Boqer Campus  
29 84990, Israel (A.S., S.S., A.K., A.B., M.S.)

30 <sup>2</sup> Department of Plant Sciences, Weizmann Institute of Science, Rehovot 76100, Israel (R.F.)

31 **Summary:**

32 The absence of remobilized purine-degraded N from older to the young growing leaves is the cause for  
33 senescence symptoms, a result of higher chloroplastic protein degradation in older leaves of nitrate  
34 starved *Atxdl1* plants.

35 **Footnotes:**

36 **List of author contributions:**

37 A.S. participated in designing the research plans and performed the experiments and analyses; S.S.  
38 participated in XDH in gel assay; A.K. participated in nitrate and ammonium detection; A.B. participated  
39 in qRT-PCR. R.F. read and commented on the manuscript. M.S. conceived the original idea, designed the  
40 research plan, and supervised the research work. The manuscript was jointly written by A.S. and M.S.

41 **Funding information:**

42 This research was supported by the Israel Center of Research Excellence (ICORE) ‘Plant Adaptation’  
43 (ISF Grant no. 757/12). Dr Sudhakar Srivastava is the recipient of a postdoctoral fellowship from the  
44 Jacob Blaustein Center for Scientific Cooperation.

45 **Corresponding author email:**

46 [gizi@bgu.ac.il](mailto:gizi@bgu.ac.il)

47 **ABSTRACT**

---

48 The nitrogen rich ureides allantoin and allantoate, are known to play a role in nitrogen delivery in  
49 *Leguminosae*, in addition to their role as reactive oxygen species scavengers. However, their role as a  
50 nitrogen source in non-legume plants has not been shown. *Xanthine dehydrogenase1* (AtXDH1) activity  
51 is a catalytic bottleneck step in purine catabolism. *Atxdh1* mutant exhibited early leaf senescence, lower  
52 soluble protein and organic-N levels as compared to wild-type (WT) older leaves when grown with 1 mM  
53 nitrate, whereas under 5mM, mutant plants were comparable to WT. Similar nitrate-dependent senescence  
54 phenotypes were evident in the older leaves of allantoinase (*Ataln*) and allantoate amidohydrolase (*Ataah*)  
55 mutants, impaired in further downstream steps of purine catabolism. Importantly, under low nitrate  
56 conditions, xanthine was accumulated in older leaves of *Atxdh1*, whereas allantoin in both older and  
57 younger leaves of *Ataln* but not in WT leaves, indicating remobilization of xanthine degraded products  
58 from older to younger leaves. Supporting this notion, ureide transporters *UPS1*, *UPS2* and *UPS5* were  
59 enhanced in older leaves of 1 mM nitrate-fed WT as compared to 5 mM. Enhanced AtXDH, AtAAH and  
60 purine catabolic transcripts, were detected in WT grown in low nitrate, indicating regulation at protein  
61 and transcript levels. Higher nitrate reductase activity in *Atxdh1* than WT leaves, indicates their need for  
62 nitrate assimilation products. It is further demonstrated that the absence of remobilized purine-degraded N  
63 from older leaves is the cause for senescence symptoms, a result of higher chloroplastic protein  
64 degradation in older leaves of nitrate starved *Atxdh1* plants.

## 65 INTRODUCTION

---

66 In plants, the degradation of purine compounds starts with the conversion of adenosine monophosphate  
67 (AMP) to inosine monophosphate (IMP) by AMP deaminase (AMPD, EC 3.5.4.6), which leads, by  
68 multiple pathways, to the production of oxypurines such as xanthine and hypoxanthine (Yoshino *et al.*,  
69 1979; Xu *et al.*, 2005; Zrenner *et al.*, 2006; Sabina *et al.*, 2007). In the degradation pathway, xanthine is  
70 initially oxidized to urate, that is further converted by urate oxidase (UO, EC 1.7.3.3) and a transthyretin-  
71 like protein to allantoin, the main end product in most mammals (Zrenner *et al.*, 2006; Reumann *et al.*,  
72 2007; Werner and Witte, 2011; Hauck *et al.*, 2014). Conversely, plants possess a set of enzymes which  
73 further break down allantoin to ureidoglycolate, catalyzed by allantoinase (ALN, EC 3.5.2.5), allantoate  
74 amidinohydrolase (AAH, EC 3.5.3.9.) and ureidoglycine aminohyrolase (UGlyAH, EC 3.5.3.-.) (Werner  
75 *et al.*, 2010, 2013). The ureidoglycolate amidohydrolase (UAH, EC 3.5.1.116.) converts ureidoglycolate  
76 to the basic metabolic building blocks, glyoxylate and ammonium (Werner *et al.*, 2013). The release of  
77 four ammonium molecules, that essentially should be reassimilated, parallel the sequential hydrolysis of  
78 purines (Werner *et al.*, 2010).

79 Environmental stimuli can induce premature leaf senescence (Miller *et al.*, 1999; Munne-Bosch  
80 and Alegre, 2004; Pageau *et al.*, 2006; Lim *et al.*, 2007). Natural leaf senescence occurs in a coordinated  
81 manner (Lim *et al.*, 2003); it starts from inhibition of leaf expansion (Diaz *et al.*, 2005), followed by  
82 induction of metabolic changes that result in nutrient degradation and remobilization (Pate, 1980;  
83 Simpson *et al.*, 1983). This strategy of recycling endogenous nutrients from the senescing leaves can be  
84 used by plants to maintain growth of younger leaves and reproductive organs under nutrient-limiting  
85 stress (Aerts, 1990; Buchanan-Wollaston and Ainsworth, 1997; Hortensteiner and Feller, 2002; Eckhardt  
86 *et al.*, 2004). In the senescing leaves most nitrogen is contained in proteins (Masclaux-Daubresse *et al.*,  
87 2010), but the nucleobases such as purines are also rich in nitrogen (Thomas *et al.*, 1980; Atkins *et al.*,  
88 1982; Schubert, 1986; Brychkova *et al.*, 2015) and thus may be a source for nitrogen (N) recycling. In  
89 legumes the N fixed in the form of ureides was indeed shown to be translocated from the nodules, where  
90 the ureides are synthesized *de novo*, to the aerial plant tissues where they are degraded and used as N  
91 source (Stebbins and Polacco, 1995; Smith and Atkins, 2002b; Todd *et al.*, 2006). A role for nucleic  
92 acid/purine degradation products in plant nitrogen metabolism was presented also in non N-fixing  
93 legumes. The recycling of nucleic acids in tissues undergoing stress-induced pre-mature senescence was  
94 considered as a possible source for ureides increase in non-nodulated common bean plants (Alamillo *et al.*  
95 *et al.*, 2010). Impressively, the high levels of ureides evident in shoot and leaves of non-nodulated  
96 *Phaseolus vulgaris* plants fertilized with nitrate was suggested to be the result of remobilized N from  
97 senescent leaves to be employed for new growing tissue (Díaz-Leal *et al.*, 2012).

98 Interestingly, uric acid, allantoin, and allantoate, the products of purine degradation, were shown  
99 to be able to serve as sole nitrogen sources during the growth of Arabidopsis plants when supplemented  
100 externally to the growth medium (Desimone *et al.*, 2002; Todd and Polacco, 2004; Nakagawa *et al.*,  
101 2007). However, it was claimed that Arabidopsis plants grown on allantoin did not seem to perceive it as  
102 a good sole N source (Werner *et al.*, 2008) exhibiting a reduced growth (Desimone *et al.*, 2002).

103 We have previously demonstrated that aging and extended darkness activates the purine  
104 catabolism pathway to accumulate ureides, which act as antioxidants against oxidative stress, and delay  
105 pre-mature and natural senescence in Arabidopsis leaves (Brychkova *et al.*, 2008). Yet, the role of the  
106 senescence-induced purine degradation products such as ureides (Brychkova *et al.*, 2008) has not been  
107 fully examined in plants and no functional analysis employing relevant mutants has yet proved that purine  
108 degradation products has a role in nitrogen metabolism. The fact that leaf senescence is paralleled by a  
109 decrease in RNA (Crafts-Brandner *et al.*, 1996; Crafts Brandner *et al.*, 1998) and an increase in the level  
110 of uriedes, whereas enzymes/transcripts of genes involved in the purine degradation pathway are up-  
111 regulated during leaf senescence (Brychkova *et al.*, 2008), gives more than a clue as to the involvement of  
112 RNA degraded products in N metabolism (Werner and Witte, 2011, Have *et al.*, 2016).

113 To examine the role of purine degraded metabolites as an important nitrogen source in Arabidopsis plant  
114 development, the knockout mutants *Atxdh1*, *Ataln* and *Ataah* defective in Xanthine dehydrogenase  
115 (*XDHI*), Allantoinase (*ALN*) and Allantoate amidohydrolase (*AAH*) expression respectively, were studied  
116 under sufficient and limited nitrogen conditions. Under nitrogen deficient conditions the purine  
117 degradation pathway is activated on transcript and protein levels to provide an additional source of  
118 nitrogen from older senescent leaves to the young leaves. Growth of the purine catabolism mutants under  
119 nitrate limitation resulted in premature senescence symptoms in old leaves, but not in those of WT plants.  
120 In contrast, sufficient supply of nitrate resulted in almost full disappearance of the premature senescence  
121 symptoms, with parallel enhancement of the organic nitrogen and soluble protein content in the mutant  
122 older leaves. This was achieved by higher nitrate reductase activity in *Atxdh1* than WT leaves. Further, it  
123 was demonstrated that the absence of remobilized purine-degraded N from older leaves is the cause for  
124 senescence symptoms, a result of higher degradation of chloroplastic proteins, such as Rubisco large  
125 subunit and D1, the component of the reaction center of PSII, in older leaves of nitrate starved *Atxdh1*  
126 plants.

## 132 RESULTS

---

### 133 High nitrate supplementation prevents senescence symptoms in *Atxdh1* older leaves

134 Previously it was shown that a mutation in *AtXDHI*, a key enzyme in the purine catabolism process,  
135 confers early leaf senescence (Brychkova *et al.*, 2008). To examine the role of purine degraded

136 metabolites as an important endogenous nitrogen source, the effect of sufficient and limited nitrogen  
137 supplementation to the knockout mutants *Atxdh1*, *Ataln* and *Ataah* defective in *XDH1*, *ALN* and *AAH*,  
138 respectively was studied with 25 days old plants. Total chlorophyll levels in *Atxdh1*, *Ataln* and *Ataah*  
139 mutants old leaves supplemented with low nitrate (1 mM) were lower than in wild type (WT) old leaves,  
140 whereas no difference was noticed in the young leaves. Importantly, increasing nitrate levels in the  
141 growth medium (5 mM) enhanced the total chlorophyll level in the mutants old leaves (Fig. 1AB,  
142 Supplementary Fig. S1). Additionally, the senescence marker Cys protease senescence-associated gene 12  
143 [*SAG12* (Gepstein *et al.*, 2003)], the chlorophyll-degradation gene *ACD2* [accelerated cell death2 (Tanaka  
144 *et al.*, 2003)] and stay-green protein1 [*SNG1* (Park *et al.*, 2007)] were significantly upregulated in the old  
145 leaves of the mutants supplemented with the lowest nitrate level as compared to WT, but not in mutants  
146 old leaves in plants grown with high nitrate (Fig. 1C, Supplementary Fig. S1 C, D). These results indicate  
147 that limited nitrate supply resulted in enhanced chlorophyll degradation in mutants impaired in purine  
148 catabolism genes. This is likely due to a shortage of endogenous nitrogen sources in the mutant lines that  
149 could be repaired by higher nitrate supplementation.

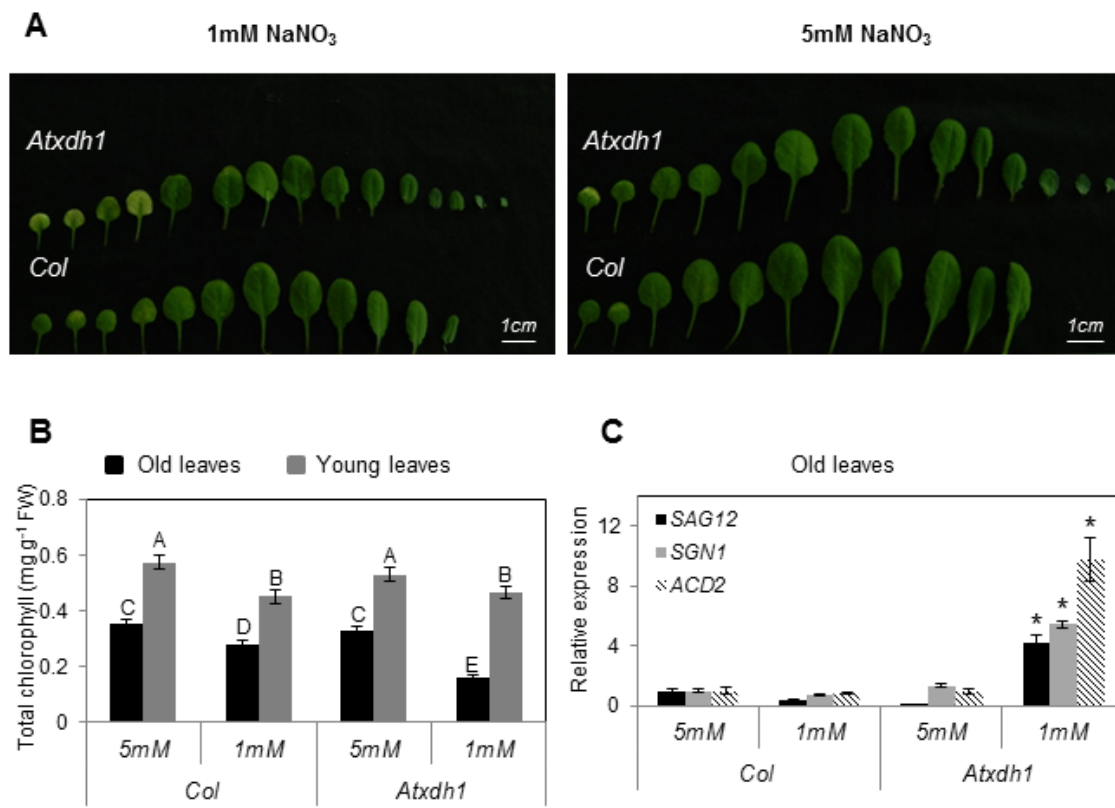

**Figure 1. Effects of different nitrate levels, supplemented to the growth medium of WT (*Col*) and *Atxdh1* mutant, on senescence symptoms in leaves.** Leaf appearance (A) from left to right is young to old where the first and last 4 leaves are designated 'young' and 'old', respectively. Total chlorophyll (B) content. Relative expression (C) of senescence marker transcripts in old leaves of *SAG12* (Suppressor of overexpression of Cys protease senescence-associated gene 12), *ACD2* (accelerated cell death2), *SGN1* (stay-green protein 1) (At5G45890, At4G37000, At4G22920, respectively). The data of chlorophyll content represent the mean obtained from a representative experiment from six independent biological replications. Values denoted by different letters are significantly different (Tukey-Kramer HSD test,  $P < 0.05$ ). The expression of each transcript was compared with the young leaves of WT in 5 mM nitrate treatment after normalization to *EF-1 $\alpha$*  transcript (At5g60390). Values marked with asterisk denotes significant difference (T-test,  $n=3$ ,  $P < 0.05$ ) between treatment and genotypes for each transcript and the data represent the mean obtained from 3 independent experiments. *Atxdh1* are SALK\_148366 and GABI\_049004 T-DNA mutants

150

151 ***Atxdh1* mutation confers lower organic nitrogen and soluble protein levels, but higher RNA**  
 152 **than in WT old leaves grown under N deficiency**

153 Levels of total nitrogen in its various forms, are key physiological indicator of plant health.  
 154 Examination of nitrogen (N) levels in the young and old leaves grown under low (1mM) and high  
 155 (5mM) nitrate, revealed a total N decrease in WT and *Atxdh1* leaves with decreasing nitrate  
 156 application. However, total nitrogen (N) level was significantly lower in old leaves of *Atxdh1* mutant  
 157 as compared to WT (Fig. 2A). Importantly, under the low nitrogen supplementation the organic N

158 level was considerably lower in the old and young leaves of the *Atxdh1* mutant as compared to WT  
159 (decrease of 1.03 and 0.83 mmol N per g DW, respectively), whereas, no significant difference was  
160 noticed between the leaves of these two genotypes when fed with high nitrate (Fig. 2B). This indicates  
161 that under low nitrate conditions the mutation in *XDHI* stimulates the degradation of organic nitrogen and  
162 protein in the older leaves (Fig. 2), to supply nitrogen essential for the growth of the younger leaves. This  
163 is consistent with the early senescence phenotype in mutant older leaves and its absence in the younger  
164 leaves, albeit the organic N in the latter was lower than in WT, but still significantly higher as compared  
165 to the old leaves in *Atxdh1* plant grown under low nitrate supply (Fig. 1, 2).

166 The high nitrate application resulted in increased nitrate content in the young and old WT and *Atxdh1*  
167 leaves, being lower in young leaves of *Atxdh1* mutant as compared to WT plants (Fig. 2C). The  
168 significantly lower nitrate accumulation in *Atxdh1* younger leaves is indicative for a higher rate of nitrate  
169 assimilation in the mutant younger leaves, to overcome the absence of ammonium, originated from  
170 unimpaired purine catabolism and employed for organic N biosynthesis in WT. Indeed, the ammonium  
171 content in the *Atxdh1* mutant was similar as in the WT grown under high nitrate conditions (Fig. 2D)  
172 indicating that nitrate was assimilated to ammonium, to be incorporated into organic molecules  
173 (Somerville and Ogren 1980; Joy 1988; Stitt, 1999; Wang et al., 2003, Coruzzi 2003). Interestingly, total  
174 soluble protein content in young leaves was similar in WT and mutant plants being significantly  
175 higher than the old leaves of both genotypes. Yet, soluble proteins were significantly lower in old  
176 leaves of 1mM nitrate fed mutant plants as compared to WT [decreased by 33% (by 0.13 mg soluble  
177 protein per g FW)], the latter having similar soluble protein levels as the 5 mM supplied WT and  
178 mutant plants (Fig. 2E). The lowest soluble protein and organic N in old leaves of the mutant fed with  
179 low nitrate (Fig. 2B, E) is indicative for remobilization of degraded protein products from these  
180 leaves.



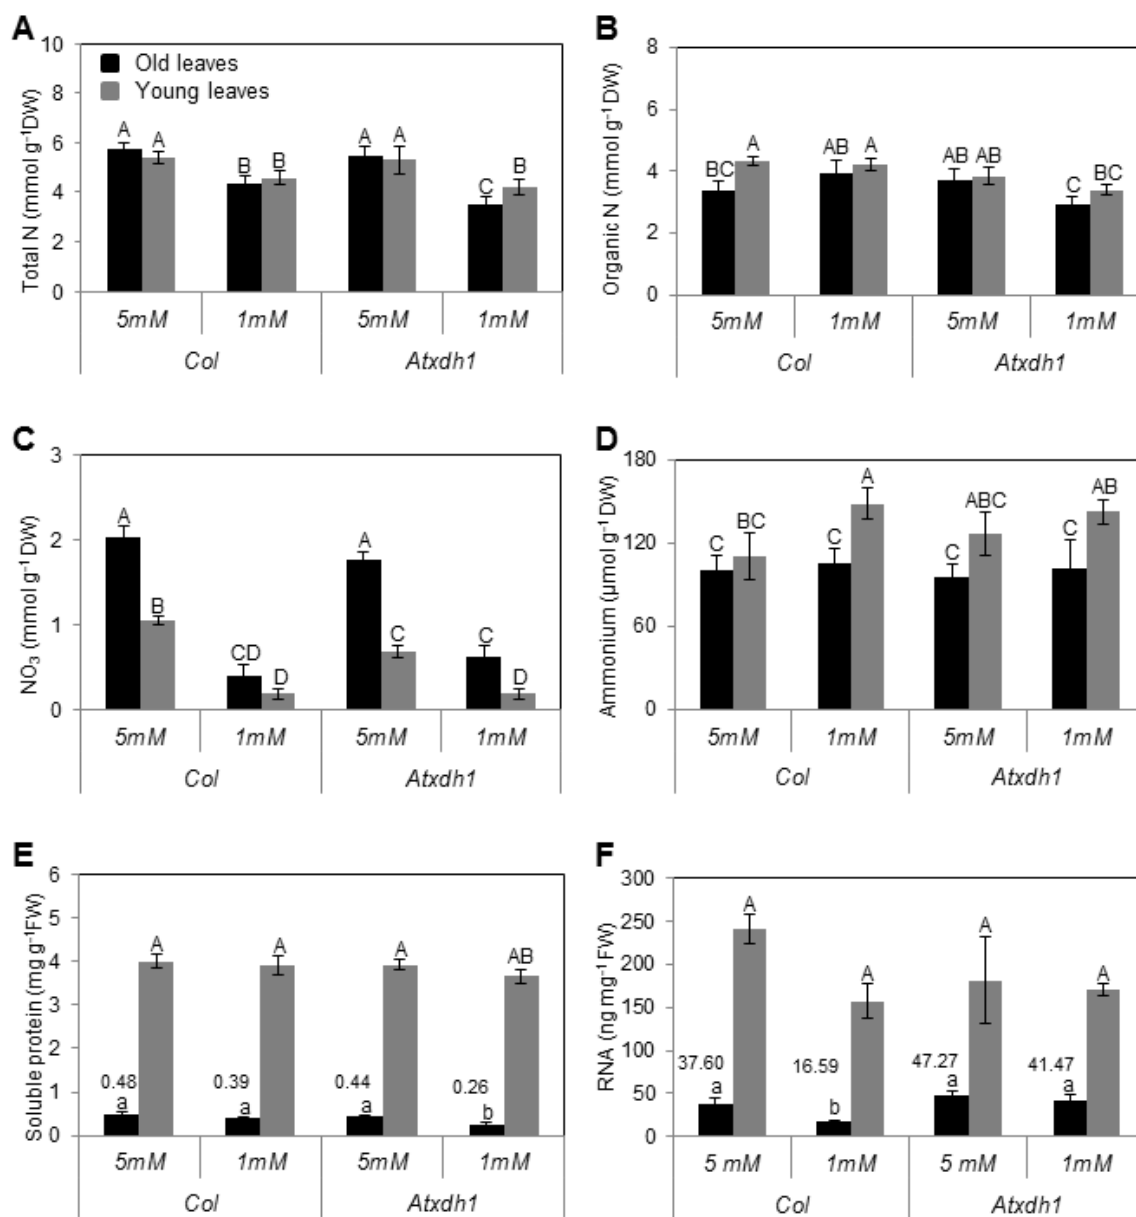

**Figure 2. Effects of different nitrate levels on total N (A), total organic N (B), nitrate (C), ammonium (D), soluble protein content (E) and total RNA content (F) in old and young leaves of WT (Col) and *Atxdh1* mutants.** Plants were grown until 25 days old in nitrogen deficient soil supplemented with one-half strength Hoagland nutrient solution supplemented with 1 or 5mM NaNO<sub>3</sub> as the only N source. The data represent the mean obtained from six independent experiments. The values denoted with different letters are significantly different according to the Tukey- Kramer HSD test, ( $P < 0.05$ ). Different upper case letters in inserts (A) to (D) indicate differences between treatments. Different capital letters in inserts (E) and (F) indicate differences between treated young leaves. Different lower case letters in inserts (E) and (F) indicate differences between treated old leaves. *Atxdh1* are SALK\_148366 and GABI\_049004 T-DNA mutants

182 The estimation of total RNA level does not represent the whole pool of purine degraded compounds,  
183 since there are additional purine pools in plants such as nucleosides and bases (eg. AMP, ADP, ATP,  
184 GMP, GDP), purine alkaloids (eg. 3-Methylxanthine, 7-methylxanthosine, Theobromine), coenzymes  
185 (e.g. NAD, NADP, FAD, coenzyme A) and adenylosuccinate, as well as isopentenyl adenosine  
186 monophosphate and more (Meyer and Wagner, 1986; Smith and Atkins, 2002; Koyama *et al.*, 2003;  
187 Lange *et al.*, 2007; Sabina *et al.*, 2007; Ashihara *et al.*, 2008; Agrimi *et al.*, 2012) Yet, the RNA  
188 estimation is a good indicator for the process, especially when considering the level of the ureides  
189 accumulated in *Ataln* mutants (see below). With this caveat in mind, the significant low RNA level in  
190 WT old leaves fed with low nitrate as compared to the RNA levels in WT supplemented with high  
191 nitrate or mutant leaves fed with low or high nitrate is indicative for the employment of purine  
192 degradation product for N remobilization from these leaves to the upper leaves, where no differences  
193 in RNA levels were evident within nitrate treatments or between genotypes (Fig. 2F). Overall, the  
194 significant rate of decrease in total N, organic N, and soluble proteins and the higher RNA in the old  
195 mutant leaves as compared to WT old leaves in low nitrate fed plants, suggests the negligible N  
196 remobilization from purines and the significant N degradation and remobilization from mutant old  
197 leaves proteins.

### 198 **Low nitrogen supplementation confers enhancement of ureide transporter transcripts in** 199 **old leaves of WT**

200 Ureides, the purine degradation products, were shown to be transported from the nodules of legume roots  
201 via the xylem (Collier and Tegeder, 2012) to the shoot (Schubert, 1981). By employing orthologue *AtUPS*  
202 gene expression in yeast and/or xenopus with other than Arabidopsis promoters it was shown that the  
203 *AtUPS1* acts as xanthine and allantoin permeases whereas *AtUPS2* is an uracil, and *AtUPS5* is likely  
204 more a xanthine and allantoin permease (Desimone *et al.*, 2002; Schmidt *et al.*, 2004, 2006). Recently,  
205 *AtUPS5* was suggested to act as a key component in allantoin transport to the shoots (Schmidt *et al.*,  
206 2006, Lescano, 2016), whereas *AtUPS1* was shown to be significantly up-regulated in adult Arabidopsis  
207 shoot as a response to a sudden total nitrogen starvation (Krapp *et al.*, 2011). The lower total RNA level  
208 in old leaves of nitrogen starved WT as compared to *Atxdh1* (Fig. 2F), led us to explore the transcript  
209 expression of these UPS transporters. Overall, older leaves had higher levels of all transporters compared  
210 to younger leaves. The expression of *AtUPS1*, *AtUPS2* and *AtUPS5* was especially high in old WT leaves  
211 of plants fed with 1 mM nitrate compared to plants supplemented with 5 mM nitrate or in *Atxdh1* mutant  
212 plants (Fig. 3). Importantly, the expression of *AtUPS1* and *AtUPS2* in old and young leaves of low nitrate  
213 fed *Ataln* plants was folds higher than in the WT plant, whereas *AtUPS5* in old leaves of *Ataln* was  
214 similar as shown in WT supplemented with low nitrate (Fig. 3). These results support the notions of i) the

215 role of *AtUPS1*, *AtUPS2* and *AtUPS5* in mediating ureide transport and ii) ureide remobilization from the  
 216 old leaves to the young growing leaves of nitrate starved plants. It also suggests that induction of the *UPS*  
 217 transcripts is sensitive to the flux of catabolic products and these are lacking in the *Atxdh1* mutant.

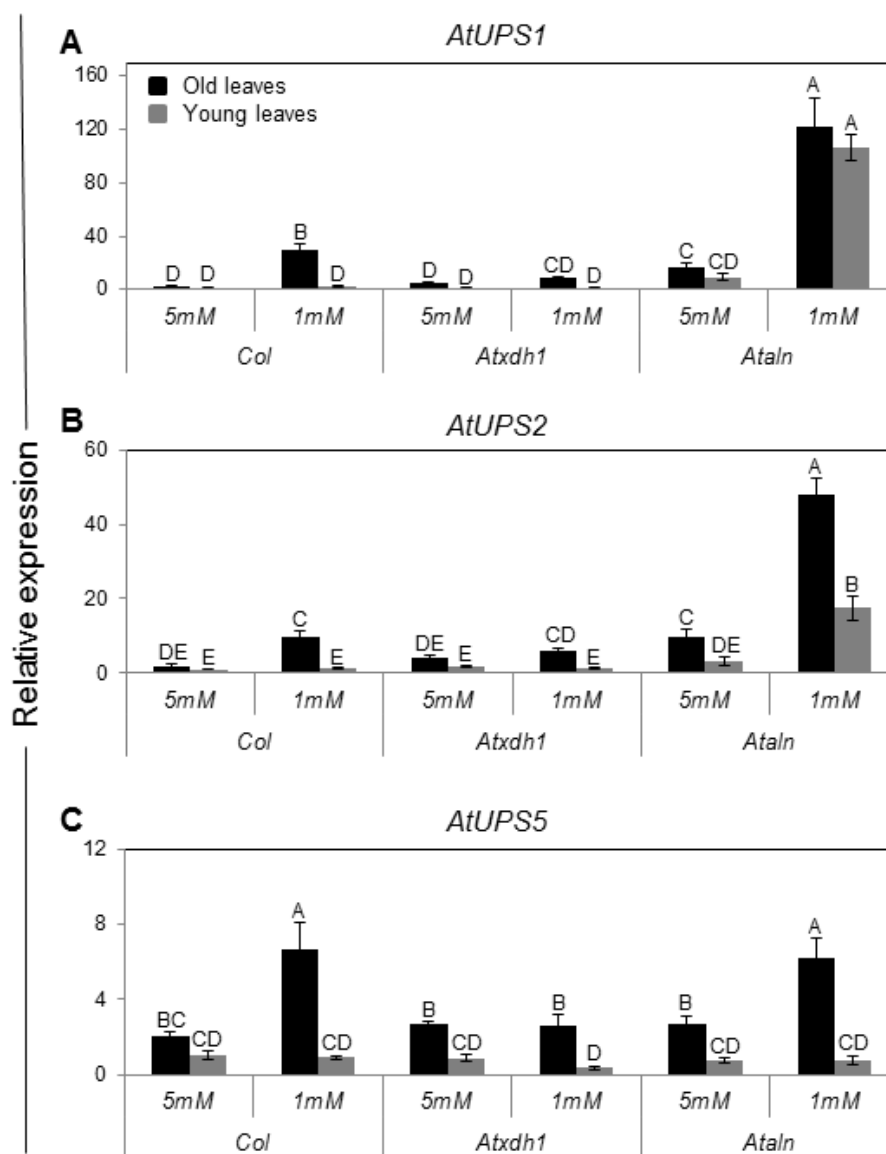

**Figure 3. Transcript expression levels of the ureide permeases, *AtUPS1*(A), *AtUPS2* (B) and *AtUPS5* (C), in old and young leaves of WT (Col), *Atxdh1* and *Ataln* mutants in response to nitrate level supplemented to the growth medium.** Quantitative analysis of transcripts by real-time RT-PCR was performed using 25 old plants grown on nitrogen deficient soil supplemented with 1 or 5mM NaNO<sub>3</sub> as the only N source. The expression of each treated line was compared with the young leaves of Col in 5mM nitrate treatment after normalization to *EF-1 $\alpha$*  transcript (*At5g60390*). The data represent the mean obtained from three independent experiments (Tukey-Kramer HSD test, P < 0.05). *Atxdh1* and *Ataln* are SALK\_148366 and SALK\_013427 T-DNA mutants respectively.

218

## 219 **Xanthine and allantoin catabolism in WT and mutants impaired in purine catabolism**

220 In case of catabolic activity substrates are expected to accumulate within the mutant lines for purine  
221 catabolism. It is therefore of interest to examine the possibility of differential accumulation in WT and  
222 mutants young and old leaves. Importantly, xanthine accumulated chiefly in the old leaves of *Atxdh1*, was  
223 several folds higher than in the young leaves and was significantly higher in old leaves in plants  
224 supplemented with low nitrate compared to old leaves of *Atxdh1* fed with high nitrate. The xanthine level  
225 in WT old leaves was folds lower than in the mutant (Fig. 4A). The possible stress effect of xanthine  
226 toxicity was examined in leaf discs sampled from 6<sup>th</sup> to 10<sup>th</sup> rosette leaves (counted from the bottom and  
227 being without senescence symptoms) exposed to water (mock) and 1mM xanthine or allantoin for 48 h.  
228 Anthocyanin accumulation was used as a sign of stress (Chalker-Scott, 1999; Gould *et al.*, 2002;  
229 Schussler *et al.*, 2008). Higher anthocyanin levels were evident in the presence of xanthine as compared  
230 to allantoin especially in *Atxdh1* when compared to WT leaf discs (Supplementary Fig. S2). This indicates  
231 that xanthine accumulation could contribute to stress and hastening of the senescence phenotype in  
232 *Atxdh1* old leaves supplemented with low N (See in Fig. 1) especially in the absence of ureides (Figure 8a  
233 in Brychkova *et al.*, 2008). However, this is likely not the case here (Fig. 1), since no senescence  
234 symptoms could be noticed in the xanthine treated leaf discs (See in Supplementary Fig. S2). Moreover,  
235 the level of xanthine accumulated in the old leaves of *Atxdh1* mutant (Fig. 4A) was far lower than the  
236 level shown recently in *Atxdh1* leaves after 5 successive days in dark [calculated as  $\sim 1 \mu\text{mol g}^{-1}$  FW from  
237 Figure 8A in (Schroeder *et al.*, 2017)], where no significant senescence symptoms is claimed to be more  
238 in the mutant compared to WT leaves (See Figure 7 in Schroeder *et al.*, 2017). Significantly, only low  
239 xanthine levels were evident in the old leaves of *Ataln* and *Ataah* mutants and WT plants (Fig. 4A,  
240 Supplementary Fig. S3). Yet, the mutants also displayed enhanced senescence symptoms relative to WT  
241 under low nitrate conditions (Fig. 1 and Supplementary Fig. S1). This suggests that the absence of the  
242 nitrogen rich allantoin (Fig. 4B) degraded products demanded for the young leaf growth, was substituted  
243 by the degraded product of older leaf chloroplastic-proteins as as can be seen by the higher chlorophyll  
244 degradation and senescence marker transcripts *SAG12* and *SGN1* in these leaves (Supplementary Fig. S1).

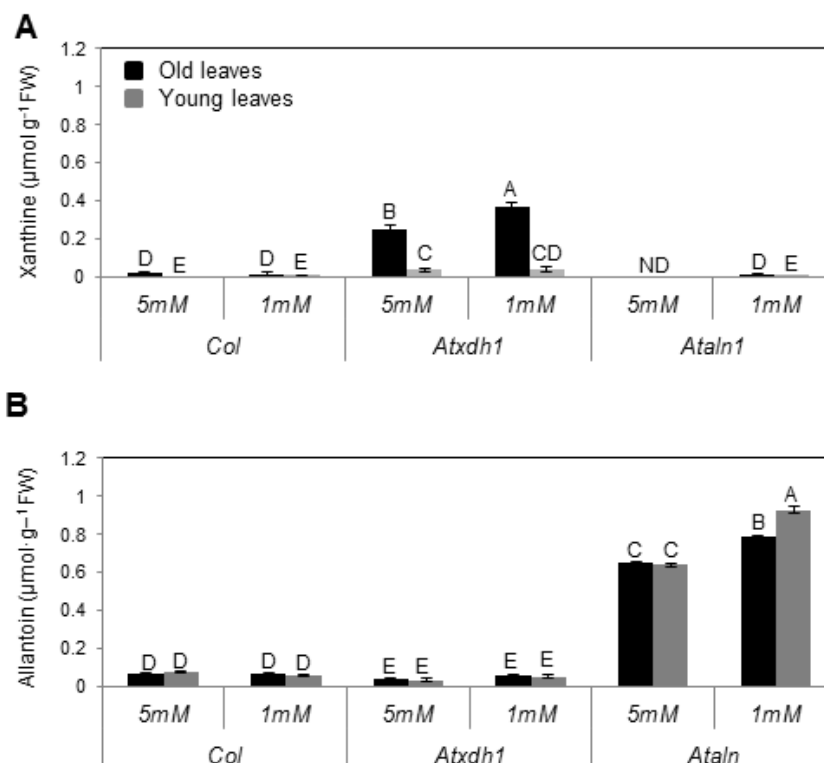

**Figure 4. The levels of xanthine (A), allantoin (B) in old and young leaves of WT (Col), *Atxdh1*, *Ataln* mutants grown in nitrogen deficient soil supplemented with 1 or 5 mM NaNO<sub>3</sub>. ND- not detected. The data represent the mean obtained from one of 5 independent experiments with similar results. The values denoted with different letters are significantly different according to the Tukey-Kramer HSD test, ( $p < 0.05$ ). Different upper case letters indicate differences between mutants and WT plants. *Atxdh1* are SALK\_148366 and GABI\_049004, whereas *Ataln* are SALK\_013427 and SALK\_146783 T-DNA mutants.**

245  
 246 Xanthine accumulation in *Atxdh1* mutant reports higher purine catabolic activity (Ma *et al.*, 2016). The  
 247 several folds higher xanthine levels accumulated in *Atxdh1* old leaves, being the highest in the low nitrate  
 248 fed plants is thus indicative for the high demand for purine degradation products blocked from being  
 249 further catabolized and remobilized for young leaf growth (Fig 4A). The low xanthine level in WT old  
 250 leaves is a result of xanthine degradation and the further consumption of the degraded ureide products, as  
 251 indicated by the low level of allantoin in the WT and their enhancement in the old leaves of the low  
 252 nitrate fed *Ataln* plants (Fig. 4B). Importantly, the negligible allantoin levels evident in *Atxdh1* leaves,  
 253 which are at a much lower level than in WT leaves (Fig. 4B), was shown recently by others (Brychkova *et*  
 254 *al.*, 2008; Watanabe *et al.*, 2014) and can be explained by a slight XDH activity resulting from AtXDH2  
 255 or another yet unknown source. Importantly, the levels of allantoin accumulated in both young and old  
 256 *Ataln* leaves were much higher than the level of xanthine accumulated in *Atxdh1* leaves, indicating that  
 257 the range between the accumulation of xanthine and allantoin, may be an indication for the rate of purine  
 258 catabolism in WT plants.

259 Interestingly, while a large difference between older and younger leaves is evident for xanthine  
260 accumulation, the ureide accumulation was much less differential (Fig. 4, Supplementary Fig. S3). This  
261 indicates that while the initial purine breakdown takes place in the older leaves, the allantoin is readily  
262 exported and the subsequent catabolic steps take place in all leaves. This scenario is consistent with the  
263 observation of elevated UPS transcript levels in WT older leaves (Fig. 3).

#### 264 **The expression of the purine degradation network is up regulated by nitrogen deficiency** 265 **and down regulated by high nitrate application**

266 During natural senescence and dark induced senescence an orchestrated regulation of transcripts related  
267 to purine catabolism was observed that includes upregulation of upstream purine catabolism transcripts  
268 such as *AtXDHI* and *AtUOX* with parallel downregulation of the downstream transcripts *AtALN* and  
269 *AtAAH* (Brychkova *et al.*, 2008). We wished to elucidate how the purine catabolism gene network is  
270 orchestrated either by N-deficiency induced senescence and/or by sufficient N that prevents senescence in  
271 purine mutant leaves. Therefore, the transcripts of the purine-degrading enzymes were analyzed in plants  
272 supplemented with low and high nitrate as the only N source. The low nitrate as compared to high nitrate  
273 treatment resulted in the increase in transcript expression of purine catabolism genes in WT plants.  
274 Whereas *AtAMPD*, *AtAAH* and *AtALN* were increased in old and young leaves, *AtXDHI* *AtUOX* were  
275 found to increase only in old leaves (Fig. 5 ). Interestingly, with the exception of the *ATXDHI* transcript,  
276 *Atxdh1* mutant showed a similar tendency towards the expression pattern of the purine degradation gene  
277 network as the WT (Fig. 5). Importantly, *Ataln* and *Ataah* mutants also exhibited a similar general  
278 expression tendency as WT and *Atxdh1* mutant (Supplementary Fig. S4, Fig. 5). Thus, we can conclude  
279 that the purine degradation transcript network is generally up regulated by nitrogen deficiency and down  
280 regulated by high nitrate application, indicating that the regulation in senescent leaves is more complex.

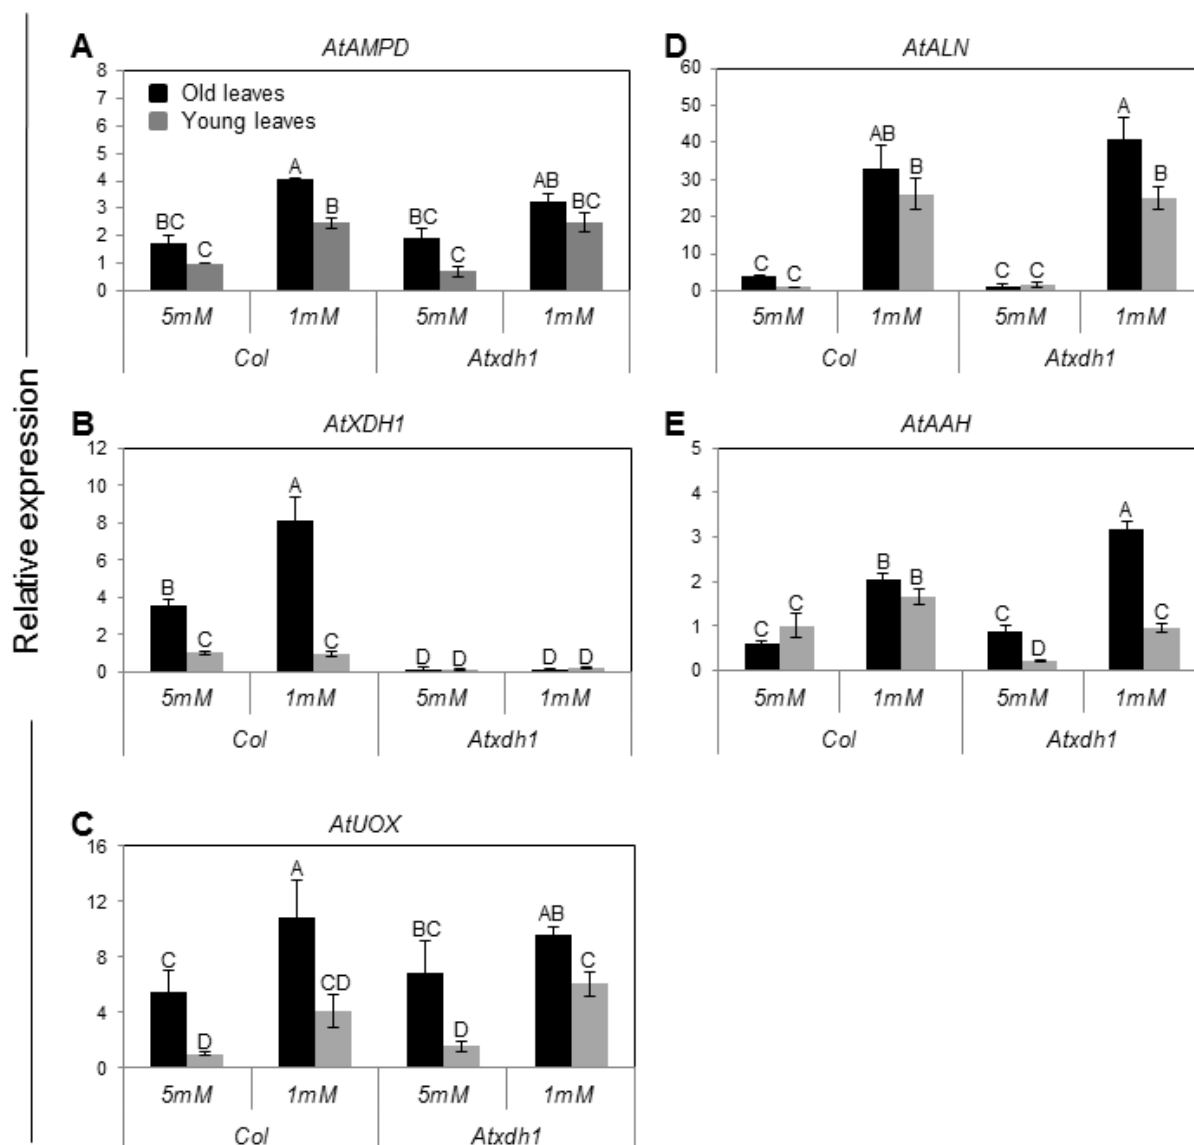

**Figure 5. Transcript expression of the purine catabolism genes in young and old leaves of WT and *Atxdh1* plants supplemented with 1 or 5mM nitrate as the only N source.** Adenosine 5'-monophosphate deaminase (*AtAMPD*) (A), xanthine dehydrogenase (*AtXDH*) (B), urate oxidase (*AtUOX*) (C), allantoinase (*AtALN*) (D) and allantoinase (*AtAAH*) (E) were presented. Quantitative analysis of transcripts by real-time RT-PCR was performed using WT (Col) and *Atxdh1* (SALK\_148366, GABI\_049004) 25 days old plants grown on nitrogen deficient soil. The expression of each treated line was compared with the young leaves of WT in 5mM nitrate treatment after normalization to *EF-1 $\alpha$*  gene product (At5g60390). The data represent the mean obtained from three independent experiments. Values denoted by different letters are significantly different (Tukey-Kramer HSD test,  $P < 0.05$ ).

281

## 282 Low nitrate supplementation confers enhanced XDH activity and AAH protein in leaves

283 To examine the levels of protein expression we chose *XDH1* and *AAH*, as representative proteins of the  
 284 upstream and downstream components of the purine catabolism, to be estimated by activity gels and  
 285 immunodetection, respectively (Fig. 6, Supplementary Fig. S5 A). The results indicated elevated levels of

286 XDH activity in low nitrate in both old and young leaves (Fig. 6A). NADH dependent superoxide  
 287 generating activity of XDH, confirmed this result (Supplementary Fig. S5 B).

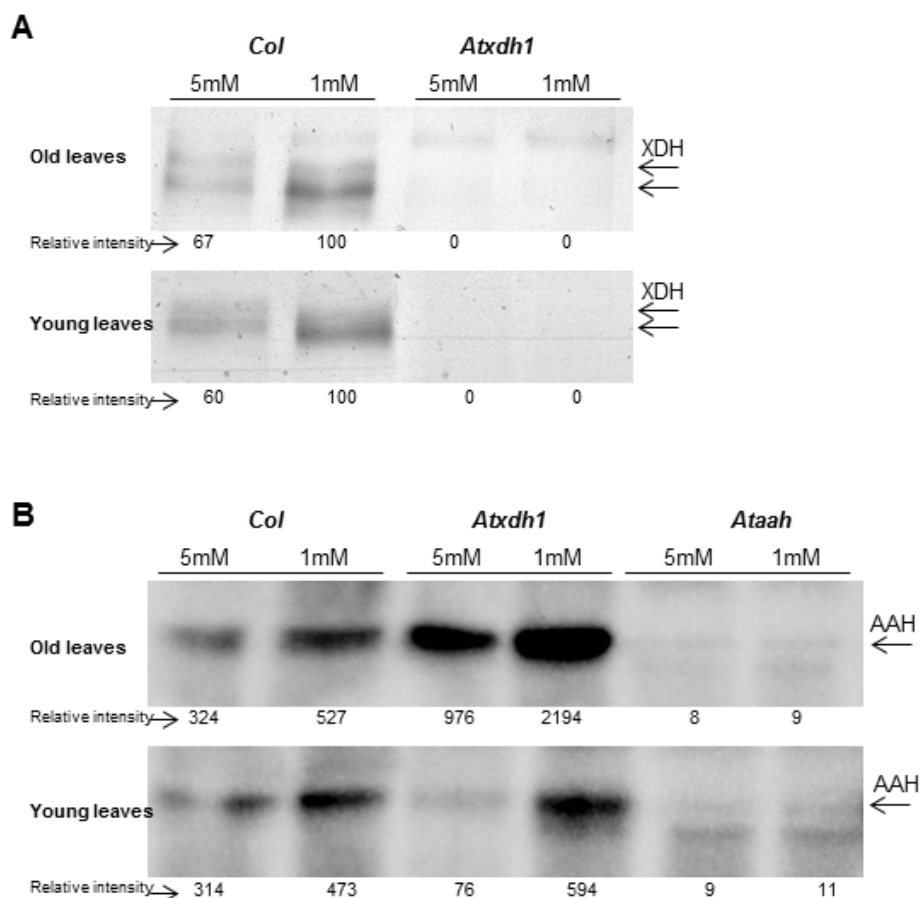

**Figure 6. The activity of xanthine dehydrogenase (XDH) (A) and immunoblot analysis of allantoin amidohydrolase (AAH) (B).** Protein extracted from old and young leaves of WT (*Col*) and *Atxdh1* mutant (SALK\_148366, GABI\_049004) grown on 1 mM or 5 mM nitrate as the only N source. The general activity of XDH in native-SDS PAGE gel was detected by using PMS as the electron-carrier intermediate and MTT as the electron acceptor. AAH protein level was analyzed by immunoblotting employing specific antiserum against AAH. Protein extracted from *Ataah* (SALK\_112631) mutant leaves was used as the negative control. For XDH activity 50 and 100  $\mu$ g crude protein extracts was loaded per each lane for the old and young leaves. For AAH analyses equal amount of 100  $\mu$ g crude protein extracts were loaded per each lane for old and young leaves respectively. The data represents one of three independent experiments with similar results.

290  
 291 AAH protein expression was evaluated by immunoblotting after native PAGE, employing highly  
 292 specific antisera (gifted by Claus-Peter Witte). The AAH protein was detected as one band in the WT,  
 293 verified by being absent in *Ataah* (Fig. 6B). Interestingly, analyses of AAH levels in WT and in the  
 294 *Atxdh1* mutant revealed that the AAH level increased in old and young leaves with decreasing nitrate  
 295 supplementation (Fig. 6B). These results indicate that XDH1 and AAH protein and activity expression are  
 296 generally in agreement with the results of the transcript network expression and indicates generation of  
 297 ureides and their degradation for further deployment of nitrogen during its deficiency (Fig. 6A, B).



298 **Nitrate reductase activity in 18 and 25 days old *Atxdh1* and WT plants fed with high and**  
299 **low nitrate levels**

300 Nitrate reductase (NR) catalyzes the first step of nitrate assimilation toward the biosynthesis of NH<sub>3</sub>, by  
301 generating the intermediate nitrite (Campbell, 1988; Kaiser and Huber, 1994; Sivasankar and Oaks,  
302 1996). To examine the influence of purine catabolism potential, NR activity was estimated in young and  
303 old leaves of 18 days old WT and *Atxdh1* mutant plants supplemented with high and low nitrate as the  
304 only N source (Fig. 7A). In general NR activity was significantly higher in younger leaves than in older  
305 leaves. These results are consistent with the finding that primary N-assimilating enzymes decrease with  
306 aging, as shown before (Masclaux et al. 2000). In addition, the level of NR activity was always more  
307 elevated in the mutant line. Lower nitrate levels were detected in the young as compared to the old leaves  
308 of 25 and 18 days old plants (Fig. 2C and Fig. 7 B, respectively) and in the *Atxdh1* mutant compared to  
309 the WT in the 18 days old plants (Fig. 7B) indicating a higher nitrate assimilation by NR (Fig. 7A). The  
310 higher NR activity in the mutant younger leaves, followed by lower nitrate, may indicate compensation  
311 for the lack of remobilized purine-dependent nitrogen source from the older to younger leaves, especially  
312 in the nitrate starved *Atxdh1* mutant plants.

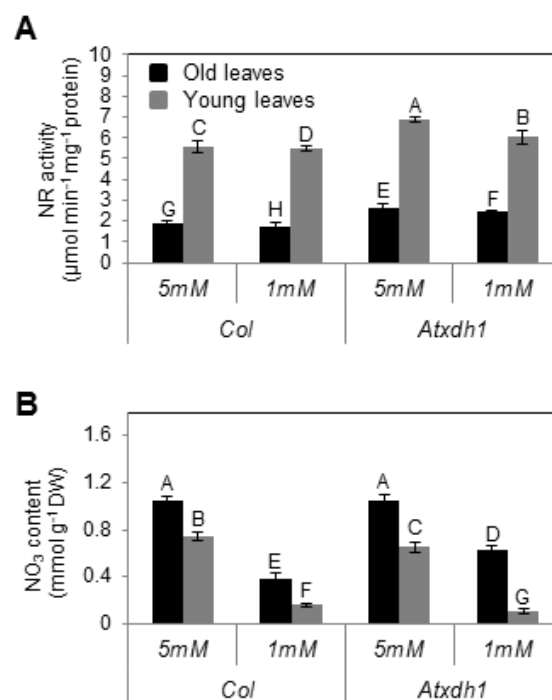

**Figure 7. Nitrate reductase activity (A) and nitrate content (B) in old and young leaves of WT (Col) and *Atxdh1* mutant as affected by nitrate level supplemented to the growth medium.** Eighteen days old plants grew in nitrogen deficient soil supplemented with one-half- Hoagland nutrient solution containing 1 or 5mM NaNO<sub>3</sub> as the only N source. The data represent the mean obtained from three independent experiments. Values denoted by different letters are significantly different (Tukey-Kramer HSD test, P < 0.05). *Atxdh1* are GABI\_049D04 and SALK\_148366 T-DNA mutants.

313

## 314 DISCUSSION

---

315 In tropical legumes such as soybean, cowpea and common bean, symbiotic N fixation in plant nodules  
316 leads to the incorporation of the fixed N into purine nucleotides to be converted into ureides, which are  
317 used as major nodule (root) to shoot nitrogen transport compounds (Schubert, 1986; Amarante *et al.*,  
318 2006). In other plants, leaf senescence has been shown to be accompanied by a decrease in nucleic acids  
319 content (Masclaux *et al.*, 2000). Hence, it is reasonable to consider that relatively N enriched ureides (1:1  
320 C/N ratio) could serve as possible endogenous conduits for remobilized nitrogen during plant growth and  
321 development in non-legumes (Have *et al.*, 2016). In support of this notion is the observation that ureides  
322 accumulate in several non-legume shrubs and trees, likely for storage and translocation of nitrogen  
323 (Schmidt and Stewart, 1998).

324 The presence of all components necessary for purine catabolism and its recycling and  
325 remobilization are well established in non-legumes plants (Todd and Polacco, 2006; Todd *et al.*, 2006;  
326 Zrenner *et al.*, 2006; Werner and Witte, 2011). However, the physiological role of purine degradation,  
327 how it contributes to N remobilization and overall N nutrition and the conditions under which it becomes  
328 a critical limiting step in organ survival are not known.

329 By analyzing the central mutations of the purine degradation pathway under nitrogen-limiting  
330 conditions, we show the critical role of the purine degraded product in providing nitrogen. Based on this  
331 work, one general physiological role of purine degradation in plants is to optimize the use of N resources  
332 by recycling purines from N source tissues such as older leaves for remobilization to growing organs and  
333 tissues as N-sinks.

### 334 **The integration of nitrogen starvation and impairment in purine catabolism results in early** 335 **senescence symptoms in old leaves of Arabidopsis plants.**

336 Leaf senescence hallmarks - decrease in chlorophyll level, soluble protein content, organic nitrogen  
337 content and enhancement of senescence molecular markers were evident in the Arabidopsis mutant plants  
338 *Atxdh1*, *Ataln* and *Ataah* supplemented with 1mM nitrate as the only N source (Fig. 1, 2, Supplementary  
339 Fig. S1). Leaf senescence has an important role in nitrogen metabolite management, to remobilize  
340 important degraded N containing components for the re-assimilation of nitrogen resulting from  
341 chloroplast degradation, hydrolysis of stromal proteins and other degraded organelles and cell  
342 components (Masclaux *et al.*, 2000; Hörtensteiner and Feller, 2002; Eckhardt *et al.*, 2004; Fischer, 2007;  
343 Liu *et al.*, 2008). A similar metabolic strategy was suggested to take place in senescence that resulted  
344 from nitrogen limitation (Aerts, 1990). Importantly, old leaves of WT plants that undergo nitrate  
345 starvation do not show senescence symptoms whereas the various independent mutants; *Atxdh1*, *Ataln*  
346 and *Ataah*, impaired in the purine catabolism pathway did (Fig. 1, 2, Supplementary Fig. S1). Senescence

347 symptoms and elevated expression of the senescence marker genes *SAG12*, *SGN1* and *ACD2* were noted  
348 in old leaves of the purine pathway mutants grown with low nitrate (Fig. 1, Supplementary Fig. S1).  
349 These leaves also exhibited significantly higher expression of *GLN1.1*, *GDH1*, *GDH2* transcripts as  
350 compared to WT (Supplementary Fig. S6). Enhanced expression of the latter transcripts was shown  
351 previously to be associated with protein degradation necessary to remobilize nitrogen from senescent  
352 leaves in tobacco (Masclaux *et al.*, 2000; Pageau *et al.*, 2006). Considering the absence of all these  
353 described senescence symptoms in old leaves of nitrate starved WT one must conclude that the absence of  
354 purine catabolism forces the plant to compensate for nitrogen shortage by activating chloroplast proteins  
355 degradation in the old leaves (Matile *et al.*, 1996; Suzuki and Shioi, 1999; Pruzinska' *et al.*, 2005). Hence,  
356 a robust catabolic pathway is necessary to prevent premature senescence.

### 357 **Allantoin, a degraded N enriched purine metabolites is remobilized from the old to the** 358 **young growing leaves**

359 The lack of senescence symptoms in the old leaves of nitrate starved WT plants, whereas *Atxdh1*, *Ataln*  
360 and *Ataah* mutants exhibited senescence symptoms that could be prevented by enhanced nitrate  
361 supplementation (Fig. 1 and Supplementary Fig. S1), indicate the essentiality of a normal active purine  
362 catabolism pathway for an efficient nitrogen metabolism. Importantly, while the decrease in soluble  
363 protein and organic N in the old leaves of nitrate starved *Atxdh1* mutant could be avoided by  
364 supplementation of 5 mM nitrate, a significantly lower nucleic acid level, expressed as total RNA, was  
365 detected in old leaves of the nitrate starved WT, whereas no senescence symptoms were noticed (Fig. 2).  
366 These results support a notion of remobilization of the degraded nucleic base purine metabolites such as  
367 ureides from the old to young leaves. This notion was additionally supported by allantoin infiltration by  
368 injection into the old leaves of WT and *Atxdh1* mutant, where a significant enhancement of allantoin  
369 levels was evident not only in the injected leaves, but in the middle and the young leaves of WT as well  
370 as *Atxdh1* mutant as compared to the control (H<sub>2</sub>O) infiltrated plants. Importantly, the accumulated  
371 allantoin was significantly higher in the youngest than in the middle leaves (Supplementary Fig. S7). This  
372 scenario is further supported by the significant enhanced expression of *AtUPS1*, *AtUPS2* and *AtUPS5*  
373 transporters in old WT leaves of nitrate starved plants compared to plants supplemented with high nitrate  
374 or to *Atxdh1* mutant plants (Fig. 3). The up-regulation of the nitrogen-related transporters was previously  
375 suggested as an indication that the transporters participate in the remobilization of the related nitrogen  
376 forms from the senescing tissues (Kojima *et al.*, 2007). Hence, enhanced expression of the ureide  
377 transporters is indicative of ureide remobilization from the old leaves to the young growing leaves of  
378 nitrate starved plants. Furthermore, the enhanced transcript levels of the upstream and downstream purine  
379 catabolism genes as well as their protein levels were preferentially detected in old leaves of nitrate starved

380 plants (Fig. 5, 6 and Supplementary Fig. S4). Such orchestration of purine catabolism should normally  
381 result in full degradation of purine metabolites and indeed, xanthine and allantoin do not accumulate in  
382 WT leaves (Fig. 4), whereas they do accumulate in their related mutants. Higher accumulation of xanthine  
383 was evident in the old as compared to the young leaves of *Atxdh1* mutants and significantly higher  
384 allantoin was noticed in the young leaves of *Ataln* mutant. This indicates that xanthine is mostly degraded  
385 in the old leaves and the majority of the generated allantoin is remobilized to the young leaves (Fig. 4).  
386 The results support the notion of ureide remobilization taking place from the old leaves to the young  
387 growing leaves.

388 **Higher protein degradation during the period of 18 to 25 day after germination is the cause**  
389 **for pre-mature senescence symptoms in the older leaves of nitrate starved *Atxdh1* plants.**

390 N remobilisation was shown to start earlier and with increased rate of the remobilized N when plants  
391 grow with low as compared to high nitrogen (Ta and Weiland, 1992; Uhart and Andrade, 1995).  
392 Emerging and growing organs, such as young leaves, are a potential sink to trigger N remobilisation from  
393 older plant parts, that includes N remobilisation from leaf to leaf during the vegetative phase (Wendler *et*  
394 *al.*, 1995; Masclaux-Daubresse *et al.*, 2008). Proteins in the mature leaves are potential N storage to be  
395 degraded and remobilized to the young growing leaves (Hensel, 1993; Masclaux *et al.*, 2000;  
396 Hörtensteiner and Feller, 2002; Fischer, 2007; Liu *et al.*, 2008). Amongst these, are chloroplastic proteins  
397 such as Rubisco, which represent 50% of the total proteins in mature leaves of C3 plants (Staswick,  
398 1997). Indeed, Rubisco large subunit and D1 protein (encoded by *psbA* transcript), a component of the  
399 reaction center of PSII (Keren *et al.*, 1997), both chloroplast related proteins, were decreased in old leaves  
400 of nitrogen limited *Atxdh1* mutant, whereas, the level of the autophagy-related protein ATG8a was  
401 enhanced, indicating enhanced remobilization of the degraded protein products (Supplementary Fig. S8).  
402 This is consistent with the observation of the 33% or even more than the 45% reduction of the soluble  
403 protein content in these leaves as compared to the older leaves of the WT starved plant or the old leaves  
404 of the elevated nitrate fed plant, respectively (Fig. 2E).

405 Importantly, no difference in chlorophyll content was evident, and no yellowish of leaves was noticed in  
406 the old leaves of the nitrate starved *Atxdh1* plants at the age of 18 days (Supplementary Fig. S9A and B).  
407 Furthermore, at this growth stage the mutation in *AtXDHI*, or the level of the supplemented nitrate had no  
408 effect on the level of the soluble proteins in the old leaves (Supplementary Fig. S9 C). Considering that  
409 the level of the soluble proteins decreased in the older leaves and increased in the younger leaves of the  
410 25 as compared to the 18 days old plants (compare Supplementary Fig. S9C to Fig. 2E), our results  
411 indicate a higher soluble protein degradation and remobilization rate from the older to the younger leaves  
412 of the nitrate starved *Atxdh1* than WT plants. Further considering that the nitrogen-to-protein conversion

413 factor ranged in plant leaves from 6.25 to 4.43 (Yeoh and Wee, 1994) the decrease of 0.13 mg protein g<sup>-1</sup>  
414 FW indicates the remobilization of 20.8 to 29.3 µg more N originating from degraded soluble protein, in  
415 N starved mutant older leaves as compared to WT (Fig. 2E). Importantly, the 0.37 or 0.78 µmol g<sup>-1</sup> FW  
416 xanthine or allantoin (Fig. 4), contains 20.71 or 43.65 µg N g<sup>-1</sup> FW (see calculation in Supplemental  
417 Table S2) accumulated in the old leaves of nitrate starved *Atxdh1* and *Ataln* mutants respectively, that  
418 likely represents the rate of purine catabolism and remobilization of the resulting N from older to younger  
419 growing WT leaves. Given so, the results clearly demonstrate that the absence of the purine degraded N  
420 remobilized from the older leaves is the cause for the senescence symptoms, a result of higher soluble  
421 protein degradation, several days before bolting, in older leaves of nitrate starved *Atxdh1* plants.

### 422 **The level of the applied nitrate negatively regulates purine degradation in Arabidopsis** 423 **leaves**

424 The application of nitrate was shown to downregulate *AtALN* and *AtAAH* transcripts in two nitrogen  
425 starved Arabidopsis plants (Werner *et al.*, 2008) and inhibit nodule formation as well as the fixation of  
426 atmospheric N<sub>2</sub> in legume plants (Murray *et al.*, 2016 and references therein) indicating that nitrate  
427 supplementation is associated with purine metabolism and negatively affects purine metabolite use in  
428 legumes and non-legume plants. This was clearly demonstrated by the lower accumulated xanthine and  
429 allantoin in leaves of 5 mM nitrate supplemented *Atxdh1* and *Ataln* than in the 1 mM nitrate fed mutants,  
430 respectively (Fig. 4). Nitrate supplementation is shown here to negatively regulate purine catabolism at  
431 both the transcript (Fig. 3, 5, 7) and protein (Fig. 6 and Supplementary Fig. S5) expression levels.  
432 However, another level of posttranslational modification was shown before to exist in ryegrass. In that  
433 case, the lower XDH activity as well as lower allantoin and allantoate levels in leaves of nitrate supplied  
434 annual ryegrass as compared to ammonium supplied plants (Sagi *et al.*, 1998), were attributed to the  
435 preferred allocation of the molybdenum cofactor (Moco). The catalytic center of NR and XDH1, plant  
436 molybdoenzymes, requires Moco. Preferential allocation of Moco to NR supports nitrate assimilation in  
437 the presence of high nitrate over AtXDH1 activity (Sagi *et al.*, 1997, 1998; Sagi and Lips, 1998). While  
438 not examined here directly, the enhanced AtXDH1 activity and decreased NR activity in old leaves and  
439 vice versa in young leaves, as well as the enhanced AtXDH1 activity and decreased NR activity in nitrate  
440 starved plants and vice versa in leaves of high nitrate supplied plants, supports this notion (Fig. 6, 7,  
441 Supplementary Fig. S5). This study uncovers further transcriptional and post-transcriptional levels of  
442 control.

443 High nitrate application almost fully abrogated the senescence symptoms evident in the old leaves of  
444 nitrate starved mutants, by enhancing organic nitrogen level and soluble protein content in these leaves  
445 (Fig. 1, 2 and Supplementary Fig. S1). This is attributed to NR activity that was significantly higher in

446 mutant than in WT plants when detected in leaves of 18 day old plants (Fig. 7), before the appearance of  
447 senescence symptoms (Supplementary Fig. S9). The lower nitrate (Fig. 2, 7B) and higher NR activity in  
448 *Atxdh1* mutant than in WT leaves when both plants were supplemented with high nitrate (Fig. 7) suggest  
449 that under high nitrate availability the shortage of purine originated nitrogen in *Atxdh1* mutant plant is  
450 compensated by higher nitrate assimilation.

## 451 **MATERIALS AND METHODS**

---

### 452 **Plant Material Growth Conditions**

453 *Arabidopsis thaliana* (L.) Heynh wild-type and mutants used in the current study were of the Col-0  
454 background. The following homozygous T-DNA inserted mutants were employed:  
455 *Atxdh1*(GABI\_049D04, SALK\_148366, accession No. At4g34890) described previously by us  
456 (Yesbergenova et al. 2005, Brychkova et al., 2008); *Ataln* (SALK\_ 013427, SALK\_146783, accession  
457 No. At4g04955) described before (Todd and Polacco 2006; Watanabe et al., 2014); *Ataah*  
458 (SALK\_112631; Todd & Polacco 2006, accession No. At4g20070).

459 Seeds were surface-sterilized in 80% alcohol for 2 min, washed three times in sterile water and  
460 sown on one-half strength Murashige and Skoog (MS 1/2) agar plates (Murashige and Skoog, 1962). The  
461 plates were placed at 4°C for 3 days to synchronize germination, and then were transferred to a controlled  
462 growth room at 22°C, 14/10 h light/dark photoperiod and light intensity of 150  $\mu\text{E m}^{-2} \text{s}^{-1}$ . Six-day-old  
463 seedlings were transferred each to a 0.128 L pot containing a 1:1 mixture of perlite and nutrient-free soil  
464 (Sun Gro Horticulture Canada; <http://www.sungro.com/>). Plants were irrigated twice a week with a 0.5  
465 Hoagland solution (Hoagland and Arnon, 1950) modified to contain 1 or 5 mM  $\text{NaNO}_3$ , as the only N  
466 source, where the sodium level was balanced to contain 5 mM sodium in all the treatments, by the  
467 supplementation of NaCl. Salinization was avoided by irrigation performed to leach out 50% of the  
468 irrigated nutrient solution. The leaves of plants at 18 or 25 days after germination (The latter just before  
469 bolting) were harvested, snap-frozen in liquid nitrogen and stored at  $-80^\circ\text{C}$  for further use. The first 4  
470 rosette leaves from the bottom were designated as old leaves and the upper-most 4 from top as young  
471 leaves.

### 472 **Determination of chlorophyll and anthocyanin**

473 For chlorophyll determination, 4 leaf discs were sampled from old and young rosette leaves of WT,  
474 *Atxdh1*, *Ataln*, *Ataah* mutants grown under the low and high nitrate conditions. The leaf discs (0.7mm  
475 diameter) were immersed in 90% EtOH and incubated at 4°C for 2 days in the dark. Absorbance of the  
476 extracted chlorophyll was measured at 652 nm and total chlorophyll was estimated (Ritchie, 2006). To  
477 assess the response to external xanthine and allantoin, 7mm leaf discs were sampled from rosette leaves

478 of WT and *Atxdh1* mutant plants and put in Petri dishes, on filter paper soaked with a solution containing  
479 water (mock) and 1 mM xanthine or allantoin, for two days in permanent light. Thereafter the discs were  
480 washed and the total anthocyanin was measured as described in Laby et al., 2000. In addition, the green  
481 area of the leaf disk was estimated by employing Digimizer 3.2.1.0 (<http://www.digimizer.com>) and  
482 presented as the ratio of the green part to total area of the leaf disc, as the chlorophyll damage indicator.

### 483 **Metabolites Analysis**

484 Samples (100 mg) were grounded in 25 mM pH 7.5 K<sub>2</sub>PO<sub>4</sub>/KH<sub>2</sub>PO<sub>4</sub> buffer (1:4 w/v) using a chilled  
485 mortar and pestle (Brychkova *et al.*, 2008; Lescano *et al.*, 2016). The resulting homogenates were  
486 transferred to 1.5 ml micro-centrifuge tubes, centrifuged at 15000 g for 20 min at 4°C, and the  
487 supernatant was used for analyses. Quantification of the ureides, allantoin and allantoate was performed  
488 using the differential conversion of ureide compounds to glyoxylate and colorimetric detection described  
489 by Vogels and Van Der Drift, (1970) and employed by others (Todd *et al.*, 2006; Brychkova *et al.*, 2008;  
490 Werner *et al.*, 2008, 2013; Watanabe *et al.*, 2014; Lescano *et al.*, 2016; Takagi *et al.*, 2016). Xanthine  
491 was detected using the xanthine oxidase assay as previously described (Brychkova *et al.*, 2008a).  
492 Ammonium was detected by Nessler method (Molins-Legua *et al.*, 2006). Nitrate content was analyzed  
493 according to Cataldo *et al.* (1975). Total N in the dried tissues was measured by an elemental analyzer  
494 (Thermo Scientific™ FLASH 2000 CHNS/O Analyzers).

### 495 **Protein Extraction and Fractionation**

496 Whole protein from Arabidopsis rosette leaves was extracted as described by Sagi *et al.*, (1998).  
497 Concentrations of total soluble protein in the resulting supernatant were determined according to  
498 (Bradford, 1976). Native-SDS PAGE was carried out as previously described (Sagi and Fluhr, 2001;  
499 Srivastava *et al.*, 2017). Samples containing the extracted proteins were incubated on ice for 30 min in  
500 sample buffer containing 47 mM Tris-HCl (pH 7.5), 2% (w/v) SDS, 7.5% (v/v) glycerol, 40 mM 1,4-  
501 dithio-DL-threitol (DTT) as the thiol-reducing agent, and 0.002% (w/v) bromophenol blue. The incubated  
502 samples were centrifuged at 15,000xg for 3 min before loading the supernatant and subsequently resolved  
503 in 7.5% (w/v) SDS-polyacrylamide separating gel and 4% (w/v) stacking gels. Native-SDS PAGE was  
504 carried out using 1.5 mm thick slabs loaded with 50 µg of old leaf or 100 µg of young leaf proteins unless  
505 mentioned otherwise.

### 506 **XDH In-gel activity and nitrate reductase kinetic activity**

507 Regeneration of the active proteins after denaturing PAGE was carried out by removal of the SDS by  
508 shaking the gel for 1 h in 10mM Tris-HCl buffer (pH 7.8) solution (65 ml buffer per ml of gel) containing

509 2mM EDTA and 1.0% (w/v) Triton X-100 (Sagi and Fluhr, 2001; Srivastava *et al.*, 2017). Following the  
510 regeneration process, the gels were assayed for normal in-gel XDH activities using 0.1mM PMS, 1mM  
511 MTT and addition of 0.5mM xanthine mixed with 1mM hypoxanthine in 0.1mM Tris-HCl buffer (pH  
512 8.5), at 25 °C under dark conditions. To detect superoxide generation activity of XDH, PMS was omitted  
513 and the mix of xanthine with hypoxanthine or 0.25 mM NADH as specific substrates were employed  
514 (Yesbergenova *et al.*, 2005). The quantity of the resulting formazan was directly proportional to enzyme  
515 activity during a given incubation time, in the presence of excess substrate and tetrazolium salt (Rothe,  
516 1974; Srivastava *et al.*, 2017).

517 For nitrate reductase activity the samples were extracted in a buffer containing 3 mM EDTA, 3.6 mM  
518 dithiothreitol (DTT), 0.25 M Tris-HCl (pH 8.48), 3 mg L-Cys, 3 mM NaMoO<sub>4</sub> and protease inhibitors  
519 including aprotinin (10µg ml<sup>-1</sup>) and pepstatin (10µg ml<sup>-1</sup>) and the activity was detected as previously  
520 described (Sagi *et al.*, 1997).

## 521 **Western Immunoblotting**

522 Protein crude extract samples (20–50µg) extracted as described by Sagi *et al.*, (1998), were subjected to  
523 Native-PAGE for detecting AAH and SDS-PAGE electrophoresis for the other proteins. The fractionated  
524 proteins were transferred onto polyvinylidene difluoride membranes (Immun-Blot membranes, Bio-Rad).  
525 The membrane was probed first with the following primary antibodies: Anti-AAH (a gift from Claus-  
526 Peter Witte, <https://www.ipe.uni-hannover.de>) at 1:500 dilution ratio, antibody specific to D1 protein [a  
527 component of the reaction center of PSII] (Agrisera, <http://www.agrisera.com>) at 1:10,000 ratio, specific  
528 antibodies to autophagy-related protein 8a (ATG8a) (Abcam, <http://www.abcam.com>) at 1:1,000 ratio and  
529 an antibody recognizing large subunits of Rubisco (LSU) (a gift from Michal Shapira  
530 ([http://in.bgu.ac.il/en/natural\\_science/LifeSciences/Pages/staff/Michal\\_Shapira.aspx](http://in.bgu.ac.il/en/natural_science/LifeSciences/Pages/staff/Michal_Shapira.aspx)) at a dilution ration  
531 of 1:3,000. Thereafter, the proteins under went binding with secondary antibodies diluted 5000-fold in  
532 PBS (anti-rabbit IgG; Sigma-Aldrich). Protein bands were visualized by staining with Clarity Western  
533 ECL Substrate (Bio-Rad, USA) and quantified by Image lab (Version 5.2, Bio-Rad, USA).

## 534 **Quantitative RT-PCR**

535 Total RNA was extracted from plants using the Aurum Total RNA kit according to the manufacturer's  
536 instructions (Bio-Rad). First-strand cDNA was synthesized in a 10-µl volume containing 350 ng of plant  
537 total RNA that was reverse transcribed employing an iScript cDNA Synthesis Kit (Bio-Rad) according to  
538 the manufacturer's instructions. The generated cDNA was diluted 10 times, and quantitative analysis of  
539 transcripts was performed employing the set of primers presented in Supplemental Table S1 designed to  
540 overlap exon junctions as previously described (Brychkova *et al.*, 2007).



## 541 **Statistical analysis**

542 All results are presented as means and standard errors of means. The data for total N, total organic  
543 nitrogen, nitrate, and ammonium represent the mean obtained from six independent experiments.  
544 Metabolite, protein content and transcripts measurements represent mean obtained through at least three  
545 independent experiments. Each treatment was evaluated using ANOVA (JMP 8.0 software,  
546 <http://www.jmp.com>). Comparisons among three or more groups were made using one-way analysis of  
547 variance with Tukey's multiple comparison tests.

## 548 **SUPPLEMENTARY DATA**

---

549 **Supplemental Figure S1.** The effect of nitrate level supplemented to the growth medium of wild-type  
550 (WT) and mutant plants impaired in the purine catabolic pathway.

551 **Supplemental Figure S2.** Effects of exogenous application of xanthine and allantoin on leaf disc  
552 appearance.

553 **Supplemental Figure S3.** The levels of the xanthine content in old and young leaves of the *Atxdh1*, *Ataln*  
554 and *Ataah* mutant and WT plants grown in nitrogen deficient soil supplemented with 1mM NaNO<sub>3</sub>.

555 **Supplemental Figure S4.** Transcript expression levels of purine catabolism transcripts in young and old  
556 leaves of WT (Col) and purine catabolism impaired plants supplemented with 1 mM or 5 mM nitrate as  
557 the only N source.

558 **Supplemental Figure S5.** Xanthine and NADH depended superoxide-generating activities of XDH in old  
559 and young WT and *Atxdh1* mutant leaves of plants grown with 1 mM or 5 mM nitrate as the only N  
560 source.

561 **Supplemental Figure S6.** The relative expression of N assimilation senescence related transcripts in old  
562 and young leaves of WT and *Atxdh1* mutant plants.

563 **Supplemental Figure S7.** The effect of allantoin infiltration to the oldest leaves on its level in old, milled  
564 and young leaves of WT and *Atxdh1* mutant plants.

565 **Supplemental Figure S8.** Immunoblot analysis of large subunit of Rubisco (LSU), component of the  
566 reaction center of PSII D1 and autophagy protein ATG8a.

567 **Supplemental Figure S9.** Leaf appearance, total chlorophyll content and soluble protein content of the  
568 old and young leaves of 18 days old WT and *Atxdh1* mutant plants.

569 **Supplemental Tables**

570 **Supplemental Table S1.** Gene-specific primer sequences used for the expression analyses

571 **Supplemental Table S2.** The calculation of nitrogen content in xanthine and allantoin accumulated in the  
572 old leaves of *Atxdh1* and *Ataln* mutants respectively.

## 573 **ACKNOWLEDGEMENTS**

---

574 This research was supported by the Israel Center of Research Excellence (ICORE) ‘Plant Adaptation’  
575 (ISF Grant no. 757/12). Dr Sudhakar Srivastava is the recipient of a postdoctoral fellowship from the  
576 Jacob Blaustein Center for Scientific Cooperation. We thank Dr. Tali Bruner for editing the manuscript.

## 577 **FIGURE LEGENDS**

578 **Figure 1. Effects of different nitrate levels, supplemented to the growth medium of WT (Col)**  
579 **and *Atxdh1* mutant, on senescence symptoms in leaves.** Leaf appearance (A) from left to right is  
580 young to old where the first and last 4 leaves are designated ‘young’ and ‘old’, respectively. Total  
581 chlorophyll (B) content. Relative expression (C) of senescence marker transcripts in old leaves of  
582 *SAG12* (Suppressor of overexpression of Cys protease senescence-associated gene 12), *ACD2*  
583 (accelerated cell death2), *SGNI* (stay-green protein 1) (At5G45890, At4G37000, At4G22920,  
584 respectively). The data of chlorophyll content represent the mean obtained from a representative  
585 experiment from six independent biological replications. Values denoted by different letters are  
586 significantly different (Tukey-Kramer HSD test,  $P < 0.05$ ). The expression of each transcript was  
587 compared with the young leaves of WT in 5 mM nitrate treatment after normalization to *EF-1 $\alpha$*   
588 transcript (At5g60390). Values marked with asterisk denotes significant difference (T-test,  $n=3$ ,  $P <$   
589  $0.05$ ) between treatment and genotypes for each transcript and the data represent the mean obtained  
590 from 3 independent experiments. *Atxdh1* are SALK\_148366 and GABI\_049004 T-DNA mutants

591 **Figure 2. Effects of different nitrate levels on total N (A), total organic N (B), nitrate (C),**  
592 **ammonium (D), soluble protein content (E) and total RNA content (F) in old and young leaves**  
593 **of WT (Col) and *Atxdh1* mutants.** Plants were grown until 25 days old in nitrogen deficient soil  
594 supplemented with one-half strength Hoagland nutrient solution supplemented with 1 or 5mM  $\text{NaNO}_3$   
595 as the only N source. The data represent the mean obtained from six independent experiments. The  
596 values denoted with different letters are significantly different according to the Tukey- Kramer HSD  
597 test, ( $P < 0.05$ ). Different upper case letters in inserts (A) to (D) indicate differences between  
598 treatments. Different capital letters in inserts (E) and (F) indicate differences between treated young  
599 leaves. Different lower case letters in inserts (E) and (F) indicate differences between treated old leaves.  
600 *Atxdh1* are SALK\_148366 and GABI\_049004 T-DNA mutants

601 **Figure 3. Transcript expression levels of the ureide permeases, *AtUPS1*(A), *AtUPS2* (B) and**  
602 ***AtUPS5* (C), in old and young leaves of WT (Col), *Atxdh1* and *Ataln* mutants in response to**  
603 **nitrate level supplemented to the growth medium.** Quantitative analysis of transcripts by real-time  
604 RT-PCR was performed using 25 old plants grown on nitrogen deficient soil supplemented with 1 or  
605 5mM  $\text{NaNO}_3$  as the only N source. The expression of each treated line was compared with the young  
606 leaves of Col in 5 mM nitrate treatment after normalization to *EF-1 $\alpha$*  transcript (At5g60390). The data  
607 represent the mean obtained from three independent experiments (Tukey-Kramer HSD test,  $P < 0.05$ ).  
608 *Atxdh1* and *Ataln* are SALK\_148366 and SALK\_013427 T-DNA mutants respectively.

609 **Figure 4. The levels of xanthine (A), allantoin (B) in old and young leaves of WT (Col), *Atxdh1*,**  
610 ***Ataln* mutants grown in nitrogen deficient soil supplemented with 1 or 5 mM  $\text{NaNO}_3$ .** ND- not  
611 detected. The data represent the mean obtained from one of 5 independent experiments with similar  
612 results. The values denoted with different letters are significantly different according to the Tukey-  
613 Kramer HSD test, ( $p < 0.05$ ). Different upper case letters indicate differences between mutants and  
614 WT plants. *Atxdh1* are SALK\_148366 and GABI\_049004, whereas *Ataln* are SALK\_013427 and  
615 SALK\_146783 T-DNA mutants.

616 **Figure 5. Transcript expression of the purine catabolism genes in young and old leaves of WT and**  
617 ***Atxdh1* plants supplemented with 1 or 5mM nitrate as the only N source.** Adenosine 5'-  
618 monophosphate deaminase (*AtAMPD*) (A), xanthine dehydrogenase (*AtXDH*) (B), urate oxidase  
619 (*AtUOX*) (C), allantoinase (*AtALN*) (D) and allantoinase (*AtAAH*) (E) were presented.  
620 Quantitative analysis of transcripts by real-time RT-PCR was performed using WT (Col) and *Atxdh1*

621 (SALK\_148366, GABI\_049004) 25 days old plants grown on nitrogen deficient soil. The expression of  
622 each treated line was compared with the young leaves of WT in 5mM nitrate treatment after  
623 normalization to *EF-1α* gene product (At5g60390). The data represent the mean obtained from three  
624 independent experiments. Values denoted by different letters are significantly different (Tukey-Kramer  
625 HSD test,  $P < 0.05$ ).

626 **Figure 6. The activity of xanthine dehydrogenase (XDH) (A) and immunoblot analysis of**  
627 **allantoate amidohydrolase (AAH) (B).** Protein extracted from old and young leaves of WT (Col) and  
628 *Atxdh1* mutant (SALK\_148366, GABI\_049004) grown on 1 mM or 5 mM nitrate as the only N source.  
629 The general activity of XDH in native-SDS PAGE gel was detected by using PMS as the electron-  
630 carrier intermediate and MTT as the electron acceptor. AAH protein level was analyzed by  
631 immunoblotting employing specific antiserum against AAH. Protein extracted from *Ataah*  
632 (SALK\_112631) mutant leaves was used as the negative control. For XDH activity 50 and 100 μg  
633 crude protein extracts was loaded per each lane for the old and young leaves. For AAH analyses equal  
634 amount of 100 μg crude protein extracts were loaded per each lane for old and young leaves  
635 respectively. The data represents one of three independent experiments with similar results.

636 **Figure 7. Nitrate reductase activity (A) and nitrate content (B) in old and young leaves of WT**  
637 **(Col) and *Atxdh1* mutant as affected by nitrate level supplemented to the growth medium.**  
638 Eighteen days old plants grew in nitrogen deficient soil supplemented with one-half- Hoagland nutrient  
639 solution containing 1 or 5mM NaNO<sub>3</sub> as the only N source. The data represent the mean obtained from  
640 three independent experiments. Values denoted by different letters are significantly different (Tukey-  
641 Kramer HSD test,  $P < 0.05$ ). *Atxdh1* are GABI\_049D04 and SALK\_148366 T-DNA mutants.

## 642 Supplemental Figures

643 **Supplemental Figure S1.** The effect of nitrate level supplemented to the growth medium of wild-type  
644 (WT) and mutant plants impaired in the purine catabolic pathway. Leaf appearance (A) and total  
645 chlorophyll content (B) of the old leaves of WT (Col), *Atxdh1* (GABI\_049D04), *Ataln* (SALK\_146783)  
646 and *Ataah1* (SALK\_112631) mutant plants. Plants were grown in nitrogen deficient soil supplemented  
647 with 1 or 5 mM NaNO<sub>3</sub> as the only N source. Relative transcript expression levels of suppressor of  
648 overexpression of Cys protease senescence-associated gene 12 [*SAG12*, (At5G45890)] (C), stay-green  
649 protein 1 [*SGN1* (At4G22920)] (D), in the old leaves of WT and mutants is presented. Transcript  
650 levels were compared to the expression in 5mM NaNO<sub>3</sub> treated WT old leaves, after normalization to  
651 Elongation factor alfa (*EFA*) gene (At5G60390) and presented as relative expression. The data  
652 represents the mean obtained from three independent experiments. Values denoted by different letters  
653 are significantly different (Tukey-Kramer HSD test,  $P < 0.05$ ).

654 **Supplemental Figure S2.** Effects of exogenous application of xanthine and allantoin on leaf disc  
655 appearance. Appearance of adaxial (left insert) and abaxial (right insert) surface is presented (A). Leaf  
656 discs removed from 6<sup>th</sup> to 10<sup>th</sup> rosette leaves [counted from the bottom (without senescence symptoms)]  
657 of WT and *Atxdh1* (SALK\_148366) mutant plants were treated with water (mock) and 1 mM xanthine  
658 or allantoin under permanent light (for 48 h). The green area ratio of adaxial (B) and abaxial (C) side  
659 was estimated by Digimizer 3.2.1.0 tool (<http://www.digimizer.com>). Discs were washed and the total  
660 anthocyanin content (D) was determined. The presented data is one of three independent experiments  
661 with similar results. Values denoted by different letters are significantly different (Tukey-Kramer HSD  
662 test,  $N=3$ ,  $P < 0.05$ ).

663 **Supplemental Figure S3.** The levels of the xanthine content in old and young leaves of the *Atxdh1*,  
664 *Ataln* and *Ataah* mutant and WT plants grown in nitrogen deficient soil supplemented with 1mM

665 NaNO<sub>3</sub>. The data represent the mean obtained from three experiments. The values denoted with  
666 different letters are significantly different according to the Tukey-Kramer HSD test; p< 0.05. Different  
667 upper case letters indicate differences between mutants and WT plants. The following T-DNA mutants  
668 were employed: *Atxdh1*, SALK\_148366 and GABI\_049004; *Ataln*, SALK\_013427 and SALK\_146783;  
669 *Ataah*, SALK\_112631 .

670 **Supplemental Figure S4.** Transcript expression levels of purine catabolism transcripts in young and  
671 old leaves of WT (Col) and purine catabolism impaired plants supplemented with 1 mM or 5 mM  
672 nitrate as the only N source. The expression of Adenosine 5'-monophosphate deaminase (*AtAMPD*) (A),  
673 xanthine dehydrogenase (*AtXDH*) (B), urate oxidase (*AtUOX*) (C), allantoinase (*AtALN*) (D) and  
674 allantoate amidinohydrolase (*AtAAH*) (E) were presented. Quantitative analysis of transcripts by real-  
675 time RT-PCR was performed using 25-days-old plants. The expression of each treated line was  
676 compared with the young leaves Col grown with 5 mM nitrate after normalization to *EF-1a* gene  
677 product (At5g60390). The data represent the mean obtained from three different experiments. Values  
678 denoted by different letters are significantly different (Tukey-Kramer HSD test, P < 0.05). The  
679 following T-DNA mutants were employed: *Atxdh1*, GABI\_049D04; *Ataln*, SALK\_146783; *Ataah*,  
680 SALK\_112631.

681 **Supplemental Figure S5.** Xanthine (A) and NADH depended (B) superoxide-generating activities of  
682 XDH in old and young WT and *Atxdh1* mutant leaves of plants grown with 1 mM or 5 mM nitrate as  
683 the only N source. Xanthine dependent XDH assay contained MTT and hypoxanthine/xanthine, NADH  
684 depended XDH assay contained NADH and MTT. The data represents one of 3 independent experiment  
685 with similar results. The lanes of old and young leaves of the activity gels contained 50 and 100 µg of  
686 crude protein extract, respectively. SALK\_148366 was employed as the T-DNA mutant of *Atxdh1*.

687 **Supplemental Figure S6.** The relative expression of N assimilation senescence related transcripts in  
688 old (A) and young leaves (B) of WT (Col) and *Atxdh1*(SALK\_148366) mutant plants. The 25-days-old  
689 plants grew in N-deficient soil containing 1 or 5mM NaNO<sub>3</sub> as the only N source. The relative  
690 expression of the following transcripts were evaluated: *Gln1;1*, *Gln1;2*, *Gln1;3*, *Gln1;4*, *Gln1;5*,  
691 *GDH1*, *GDH2* and *GDH3*. The expressed transcript levels were compared to *Gln1;5* and *GDH3*  
692 expression, respectively, in young leaves of Col grown in 5mM NaNO<sub>3</sub>, after normalization to the  
693 Elongation factor alfa (*EFα*) gene (At5g60390.1) and presented as relative expression for *Gln* and  
694 *GDH*, respectively. The data represent the mean obtained from three independent experiments. Values  
695 denoted by different letters are significantly different (Tukey-Kramer HSD test, P < 0.05).

696 **Supplemental Figure S7.** The effect of allantoin infiltration to the oldest leaves on its level in old,  
697 milled and young leaves of WT and *Atxdh1* (SALK\_148366) mutant plants. The infiltration by injection  
698 of 5mM (A), 1mM (B) or 0 [control (H<sub>2</sub>O)] allantoin solutions into the oldest leaves (the first 4 leaves  
699 from the bottom) of 18 days old plants was performed by employing 1 ml needless syringe as  
700 previously described [see sulfite infiltration by injection (Brychkova *et al.*, 2012)]. Allantoin levels was  
701 determined 3 hour after the infiltration. The presented data is the mean obtained from 3 experiments.  
702 The values denoted with different letters are significantly different according to the Tukey-Kramer  
703 HSD test; p< 0.05. Different upper case letters indicate differences between mutants and WT plants.

704 **Supplemental Figure S8.** Immunoblot analysis of the large subunit (LSU) of Rubisco (A), D1, the  
705 component of the reaction center of PSII (B) and ATG8a, an autophagy protein (C). Proteins were  
706 extracted from old leaves (first 4 leaves counted from the bottom) of WT (Col) and *Atxdh1* mutant  
707 (SALK\_148366) plants grown for 25 days on 1 or 5 mM nitrate as the only N source. 50 µg crude  
708 protein extracts was loaded into each lane.

709 **Supplemental Figure S9.** Leaf appearance (A), total chlorophyll content (B) and soluble protein  
710 content (C) of the old and young leaves of 18 days old WT (Col) and *Atxdh1* (SALK\_148366) mutant  
711 plants. Plants grew in nitrogen deficient soil supplemented with one-half strength Hoagland nutrient  
712 solutions containing 1 or 5mM NaNO<sub>3</sub> as the only N source. The data represent the mean obtained from  
713 three independent experiments. Values denoted by different letters are significantly different (Tukey-  
714 Kramer HSD test, P < 0.05).

## 715 **Supplemental Tables**

716 **Supplemental Table S1.** Gene-specific primer sequences used for the expression analyses

717 **Supplemental Table S2.** The calculation of nitrogen content in xanthine and allantoin accumulated in the  
718 old leaves of *Atxdh1* and *Ataln* mutants respectively.

719

## REFERENCES

---

- Aerts R.** 1990. Nutrient use efficiency in evergreen and deciduous species from heathlands. *Oecologia* **84**, 391–397.
- Agrimi G, Russo A, Pierri CL, Palmieri F.** 2012. The peroxisomal NAD<sup>+</sup> carrier of *Arabidopsis thaliana* transports coenzyme A and its derivatives. *Journal of Bioenergetics and Biomembranes* **44**, 333–340.
- Alamillo JM, Díaz-Leald J, Sánchez-Moran M, Pineda M.** 2010. Molecular analysis of ureide accumulation under drought stress in *Phaseolus vulgaris* L. *Plant, Cell and Environment* **33**, 1828–1837.
- Amarante L do, Lima JD, Sodek L.** 2006. Growth and stress conditions cause similar changes in xylem amino acids for different legume species. *Environmental and Experimental Botany* **58**, 123–129.
- Ashihara H, Sano H, Crozier A.** 2008. Caffeine and related purine alkaloids: Biosynthesis, catabolism, function and genetic engineering. *Phytochemistry* **69**, 841–856.
- Atkins CA, Ritchie A, Rowe PB, McCairns E, Sauer D.** 1982. De Novo Purine Synthesis in Nitrogen-Fixing Nodules of Cowpea (*Vigna unguiculata* [L.] Walp.) and Soybean (*Glycine max* [L.] Merr.). *Plant Physiology* **70**, 55–60.
- Bradford MM.** 1976. A rapid and sensitive method for the quantitation of microgram quantities of protein using the principle of protein dye binding. *Analytical Biochemistry* **72**, 248–254.
- Brychkova G, Alikulov Z, Fluhr R, Sagi M.** 2008. A critical role for ureides in dark and senescence-induced purine remobilization is unmasked in the *Atxdh1* *Arabidopsis* mutant. *Plant Journal* **54**, 496–509.
- Brychkova G, Yarmolinsky D, Batushansky A, Grishkevich V, Khozin-Goldberg I, Fait A, Amir R, Fluhr R, Sagi M.** 2015. Sulfite Oxidase Activity Is Essential for Normal Sulfur, Nitrogen and Carbon Metabolism in Tomato Leaves. *Plants* **4**, 573–605.
- Campbell WH.** 1988. Nitrate reductase and its role in nitrate assimilation in plants. *Physiologia Plantarum* **74**, 214–219.
- Cataldo D a, Haroon M, Schrader LE, Youngs VL.** 1975. Rapid colorimetric determination of nitrate in plant tissue by nitration of salicylic acid. *Communications in Soil Science and Plant Analysis* **6**, 71–80.
- Chalker-Scott L.** 1999. Environmental significance of anthocyanins in plant stress responses. *Photochemistry and Photobiology* **70**, 1–9.
- Collier R, Tegeder M.** 2012. Soybean ureide transporters play a critical role in nodule development, function and nitrogen export. *Plant Journal* **72**, 355–367.
- Coruzzi GM.** 2003. Primary N-assimilation into Amino Acids in *Arabidopsis*. *The Arabidopsis Book* **2**, 1–17.

**Crafts Brandner SJ, Regina H, Urs F.** 1998. Influence of nitrogen deficiency on senescence and the amounts of RNA and proteins in wheat leaves. *Physiologia Plantarum* **102**, 192–200.

**Crafts-Brandner SJ, Klein RR, Klein P, Hölzer R, Feller U.** 1996. Coordination of protein and mRNA abundances of stromal enzymes and mRNA abundances of the Clp protease subunits during senescence of *Phaseolus vulgaris* (L.) leaves. *Planta* **200**, 312–8.

**Desimone M, Catoni E, Ludewig U, Hilpert M, Schneider A, Kunze R, Tegeder M, Frommer WB, Schumacher K.** 2002. A novel superfamily of transporters for allantoin and other oxo derivatives of nitrogen heterocyclic compounds in *Arabidopsis*. *The Plant cell* **14**, 847–856.

**Diaz C, Purdy S, Christ A, Morot-Gaudry J-F, Wingler A, C.** 2005. Characterization of markers to determine the extent and variability of leaf senescence in *Arabidopsis*. A metabolic profiling approach. *Plant Physiology* **138**, 898–908.

**Díaz-Leal J, Gálvez-Valdivieso G, Fernández J, Pineda M, Alamillo J.** 2012. Developmental effects on ureide levels are mediated by tissue-specific regulation of allantoinase in *Phaseolus vulgaris* L. *Journal of Experimental Botany* **63**, 695–709.

**Eckhardt U, Grimm B, Hörtensteiner S.** 2004. Recent advances in chlorophyll biosynthesis and breakdown in higher plants. *Plant Molecular Biology* **56**, 1–14.

**Fischer AM.** 2007. Nutrient Remobilization During Leaf Senescence. *Senescence Processes in Plants*, 87–107.

**Gepstein S, Sabehi G, Carp MJ, Hajouj T, Neshor MFO, Yariv I, Dor C, Bassani M.** 2003. Large-scale identification of leaf senescence-associated genes. *Plant Journal* **36**, 629–642.

**Gould KS, Mckelvie J, Markham KR.** 2002. Do anthocyanins function as antioxidants in leaves? Imaging of H<sub>2</sub>O<sub>2</sub> in red and green leaves after mechanical injury. *Journal of Experimental Botany* **51**, 123–129.

**Hauck OK, Scharnberg J, Escobar NM, Wanner G, Giavalisco P, Witte C-P.** 2014. Uric acid accumulation in an *Arabidopsis* urate oxidase mutant impairs seedling establishment by blocking peroxisome maintenance. *The Plant cell* **26**, 3090–100.

**Havé M, Marmagne A, Chardon F, Masclaux-Daubresse C.** 2016. Nitrogen remobilisation during leaf senescence: lessons from *Arabidopsis* to crops. *Journal of Experimental Botany* **68**, 2513–2529.

**Hensel LL.** 1993. Developmental and Age-Related Processes that influence the longevity and senescence of photosynthetic tissues in *Arabidopsis*. *The Plant cell* **5**, 553–564.

**Hoagland DR, Arnon DI.** 1950. The water-culture method for growing plants without soil. *California Agricultural Experiment Station Circular* **347**, 1–32.

**Hörtensteiner S, Feller U.** 2002. Nitrogen metabolism and remobilization during senescence. *Journal of experimental botany* **53**, 927–937.



**Joy KW.** 1988. Ammonia, glutamine, and asparagine: a carbon-nitrogen interface. *Canadian Journal of Botany* **66**, 2103–2109.

**Kaiser WM, Huber SC.** 1994. Posttranslational Regulation of Nitrate Reductase in Higher Plants. *Plant Physiology* **106**, 817–821.

**Keren N, Berg A, Van Kan PJM, Levanon H, Ohad I.** 1997. Mechanism of photosystem II photoinactivation and D1 protein degradation at low light: The role of back electron flow. *Plant Biology* **94**, 1579–1584.

**Kojima S, Bohner A, Gassert B, Yuan L, Wirén N Von.** 2007. AtDUR3 represents the major transporter for high-affinity urea transport across the plasma membrane of nitrogen-deficient Arabidopsis roots. *Plant Journal* **52**, 30–40.

**Koyama Y, Tomoda Y, Kato M, Ashihara H.** 2003. Metabolism of purine bases, nucleosides and alkaloids in theobromine-forming Theobroma cacao leaves. *Plant Physiology and Biochemistry* **41**, 977–984.

**Krapp A, Berthome R, Orsel M, Mercey-Boutet S, Yu A, Castaings L, Elftieh S, Major H, Renou J-P, Daniel-Vedele F.** 2011. Arabidopsis Roots and Shoots Show Distinct Temporal Adaptation Patterns toward Nitrogen Starvation. *Plant Physiology* **157**, 1255–1282.

**Laby RJ, Kincaid MS, Kim D, Gibson SI.** 2000. The Arabidopsis sugar-insensitive mutants *sis4* and *sis5* are defective in abscisic acid synthesis and response. *Plant Journal* **23**, 587–596.

**Lange PR, Geserick C, Tischendorf G, Zrenner R.** 2007. Functions of Chloroplastic Adenylate Kinases in Arabidopsis. *Plant Physiology* **146**, 492–504.

**Lescano CI, Martini C, González CA, Desimone M.** 2016. Allantoin accumulation mediated by allantoinase downregulation and transport by Ureide Permease 5 confers salt stress tolerance to Arabidopsis plants. *Plant Molecular Biology* **91**, 581–595.

**Lim PO, Kim HJ, Nam HG.** 2007. Leaf senescence. *Annual Review of Plant Biology* **58**, 115–136.

**Lim PO, Woo HR, Nam HG.** 2003. Molecular genetics of leaf senescence in Arabidopsis. *Trends in Plant Science* **8**, 272–278.

**Liu J, Wu YH, Yang JJ, Liu YD, Shen FF.** 2008. Protein degradation and nitrogen remobilization during leaf senescence. *Journal of Plant Biology* **51**, 11–19.

**Ma X, Wang W-M, Bittner F, et al.** 2016. Dual and Opposing Roles of Xanthine Dehydrogenase in Defense-Associated Reactive Oxygen Species Metabolism in Arabidopsis. *The Plant Cell* **28**, 1108–1126.

**Masclaux C, Valadier MH, Brugière N, Morot-Gaudry JF, Hirel B.** 2000. Characterization of the sink/source transition in tobacco (*Nicotiana tabacum* L.) shoots in relation to nitrogen management and leaf senescence. *Planta* **211**, 510–8.

- Masclaux-Daubresse C, Daniel-Vedele F, Dechorgnat J, Chardon F, Gaufichon L, Suzuki A.** 2010. Nitrogen uptake, assimilation and remobilization in plants: Challenges for sustainable and productive agriculture. *Annals of Botany* **105**, 1141–1157.
- Masclaux-Daubresse C, Reisdorf-Cren M, Orsel M.** 2008. Leaf nitrogen remobilisation for plant development and grain filling. *Plant Biology* **10**, 23–36.
- Matile P, Hortensteiner S, Thomas H, Krautler B.** 1996. Chlorophyll Breakdown in Senescent Leaves. *Plant Physiology* **112**, 1403–1409.
- Meyer R, Wagner KG.** 1986. Nucleotide pools in leaf and root-tissue of tobacco plants: Influence of leaf senescence. *Physiologia Plantarum* **67**, 666–672.
- Miller JD, Arteca RN, Pell EJ.** 1999. Senescence-associated gene expression during ozone-induced leaf senescence in Arabidopsis. *Plant Physiology* **120**, 1015–24.
- Molins-Legua C, Meseguer-Lloret S, Moliner-Martinez Y, Campíns-Falcó P.** 2006. A guide for selecting the most appropriate method for ammonium determination in water analysis. *TrAC - Trends in Analytical Chemistry* **25**, 282–290.
- Munné-Bosch S, Alegre L.** 2004. Die and let live: Leaf senescence contributes to plant survival under drought stress. *Functional Plant Biology* **31**, 203–216.
- Murashige T, Skoog F.** 1962. A revised medium for rapid growth and bioassays with tobacco tissue cultures. *Physiologia plantarum* **15**, 473–497.
- Murray JD, Liu C-W, Chen Y, Miller AJ.** 2016. Nitrogen sensing in legumes. *Journal of Experimental Botany* **68**, 1919–1926.
- Nakagawa A, Sakamoto S, Takahashi M, Morikawa H, Sakamoto A.** 2007. The RNAi-mediated silencing of xanthine dehydrogenase impairs growth and fertility and accelerates leaf senescence in transgenic Arabidopsis plants. *Plant and Cell Physiology* **48**, 1484–95.
- Pageau K, Reisdorf-Cren M, Morot-Gaudry JF, Masclaux-Daubresse C.** 2006. The two senescence-related markers, GS1 (cytosolic glutamine synthetase) and GDH (glutamate dehydrogenase), involved in nitrogen mobilization, are differentially regulated during pathogen attack and by stress hormones and reactive oxygen species in Nicoti. *Journal of Experimental Botany* **57**, 547–557.
- Park S-Y, Yu J-W, Park J-S, et al.** 2007. The senescence-induced staygreen protein regulates chlorophyll degradation. *The Plant cell* **19**, 1649–64.
- Pate JS.** 1980. Transport and Partitioning of Nitrogenous Solutes. *Annual Review of Plant Physiology* **31**, 313–340.
- Pruzinska´ A, Tanner G, Aubry S, et al.** 2005. Chlorophyll Breakdown in Senescent Arabidopsis Leaves . Characterization of Chlorophyll Catabolites and of Chlorophyll Catabolic Enzymes Involved in the Degreening Reaction 1. *Plant Physiology* **139**, 52–63.

- Reumann S, Babujee L, Ma C, Wienkoop S, Siemsen T, Antonicelli GE, Rasche N, Lüder F, Weckwerth W, Jahn O.** 2007. Proteome analysis of Arabidopsis leaf peroxisomes reveals novel targeting peptides, metabolic pathways, and defense mechanisms. *The Plant cell* **19**, 3170–3193.
- Ritchie RJ.** 2006. Consistent sets of spectrophotometric chlorophyll equations for acetone, methanol and ethanol solvents. *Photosynthesis Research* **89**, 27–41.
- Rothe GM.** 1974. Aldehyde oxidase isoenzymes (E.C. 1. 2. 3.1) in potato tubers (*Solanum tuberosum*). *Plant and Cell Physiology* **499**, 493–499.
- Sabina RL, Paul A-L, Ferl RJ, Laber B, Lindell SD.** 2007. Adenine nucleotide pool perturbation is a metabolic trigger for AMP deaminase inhibitor-based herbicide toxicity. *Plant Physiology* **143**, 1752–1760.
- Sagi M, Fluhr R.** 2001. Superoxide production by plant homologues of the gp91(phox) NADPH oxidase. Modulation of activity by calcium and by tobacco mosaic virus infection. *Plant Physiol* **126**, 1281–1290.
- Sagi M, Lips HS.** 1998. The levels of nitrate reductase and MoCo in annual ryegrass as affected by nitrate and ammonium nutrition. *Plant Science* **135**, 17–24.
- Sagi M, Omarov RT, Lips SH.** 1998. The Mo-hydroxylases xanthine dehydrogenase and aldehyde oxidase in ryegrass as affected by nitrogen and salinity. *Plant Science* **135**, 125–135.
- Sagi M, Savidov NA, Lvov NP, Lips SH.** 1997. Nitrate reductase and molybdenum cofactor in annual ryegrass as affected by salinity and nitrogen source. *Physiologia Plantarum* **99**, 546–553.
- Schmidt A, Baumann N, Schwarzkopf A, Frommer WB, Desimone M.** 2006. Comparative studies on Ureide Permeases in *Arabidopsis thaliana* and analysis of two alternative splice variants of AtUPS5. *Planta* **224**, 1329–1340.
- Schmidt S, Stewart GR.** 1998. Transport, storage and mobilization of nitrogen by trees and shrubs in the wet/dry tropics of northern Australia. *Tree Physiology* **18**, 403–410.
- Schmidt A, Su YH, Kunze R, Warner S, Hewitt M, Slocum RD, Ludewig U, Frommer WB, Desimone M.** 2004. UPS1 and UPS2 from *Arabidopsis* mediate high affinity transport of uracil and 5-fluorouracil. *Journal of Biological Chemistry* **279**, 44817–44824.
- Schroeder RY, Zhu A, Eubel H, Dahncke K, Witte C-P.** 2017. The ribokinases of *Arabidopsis thaliana* and *Saccharomyces cerevisiae* are required for ribose recycling from nucleotide catabolism, which in plants is not essential to survive prolonged dark stress. *New Phytologist*, nph.14782.
- Schubert KR.** 1981. Enzymes of Purine Biosynthesis and Catabolism in *Glycine max*: I. comparison of activities with N(2) fixation and composition of xylem exudate during nodule development. *Plant Physiology* **68**, 1115–1122.
- Schubert KR.** 1986. Products of biological nitrogen fixation in higher plants: synthesis, transport, and metabolism. *Annual Review of Plant Physiology* **37**, 539–574.

- Schussler MD, Alexandersson E, Bienert GP, Kichey T, Laursen KH, Johanson U, Kjellbom P, Schjoerring JK, Jahn TP.** 2008. The effects of the loss of TIP1;1 and TIP1;2 aquaporins in *Arabidopsis thaliana*. *Plant Journal* **56**, 756–767.
- Simpson RJ, Lambers H, Dalling MJ.** 1983. Nitrogen Redistribution during Grain Growth in Wheat (*Triticum aestivum* L.): IV. Development of a Quantitative Model of the Translocation of Nitrogen to the Grain. *Plant Physiology* **71**, 7–14.
- Sivasankar S, Oaks A.** 1996. Nitrate assimilation in higher plants : The effect of metabolites and light. *Plant Physiology and Biochemistry* **34**, 609–620.
- Smith PMC, Atkins CA.** 2002. Purine Biosynthesis . Big in Cell Division , Even Bigger in Nitrogen Assimilation. *Plant Physiology* **128**, 793–802.
- Somerville CR, Ogren WL.** 1980. Inhibition of photosynthesis in *Arabidopsis* mutants lacking leaf glutamate synthase activity. *Nature* **286**, 257–259.
- Srivastava S, Brychkova G, Yarmolinsky D, Soltabayeva A, Samani T, Sagi M.** 2017. Aldehyde Oxidase 4 plays a critical role in delaying silique senescence by catalyzing aldehyde detoxification. *Plant Physiology*, pp.01939.2016.
- Staswick P.** 1997. The occurrence and gene expression of vegetative storage proteins and a Rubisco Complex Protein in several perennial soybean species. *Journal of Experimental Botany* **48**, 2031–2036.
- Stebbins NE, Polacco JC.** 1995. Urease is not essential for ureide degradation in soybean. *Plant Physiology* **109**, 169–175.
- Suzuki Y, Shioi Y.** 1999. Detection of Chlorophyll Breakdown Products in the Senescent Leaves of Higher Plants. *Plant and Cell Physiology* **40**, 909–915.
- Ta CT, Weiland RT.** 1992. Nitrogen Partitioning in Maize during Ear Development. *Crop Science* **32**, 443.
- Takagi H, Ishiga Y, Watanabe S, et al.** 2016. Allantoin, a stress-related purine metabolite, can activate jasmonate signaling in a MYC2-regulated and abscisic acid-dependent manner. *Journal of Experimental Botany* **67**, 2519–2532.
- Tanaka R, Hirashima M, Satoh S, Tanaka A.** 2003. The *Arabidopsis*-accelerated cell death Gene ACD1 is Involved in Oxygenation of Pheophorbide a: Inhibition of the Pheophorbide a Oxygenase Activity does not Lead to the “Stay-Green” Phenotype in *Arabidopsis*. *Plant and Cell Physiology* **44**, 1266–1274.
- Thomas RJ, Feller U, Erismann KH.** 1980. Ureide metabolism in non-nodulated *Phaseolus vulgaris* L. *Journal of Experimental Botany* **31**, 409–417.
- Todd CD, Polacco JC.** 2004. Soybean cultivars “Williams 82” and “Maple Arrow” produce both urea and ammonia during ureide degradation. *Journal of Experimental Botany* **55**, 867–877.

**Todd CD, Polacco JC.** 2006. AtAAH encodes a protein with allantoate amidohydrolase activity from *Arabidopsis thaliana*. *Planta* **223**, 1108–1113.

**Todd CD, Tipton PA, Blevins DG, Piedras P, Pineda M, Polacco JC.** 2006. Update on ureide degradation in legumes. *Journal of Experimental Botany* **57**, 5–12.

**Uhart SA, Andrade FH.** 1995. Nitrogen and carbon accumulation and remobilization during grain filling in maize under different source/sink ratios. *Crop Science* **35**, 183–190.

**Vogels GD, Van Der Drift C.** 1970. Differential analyses of glyoxylate derivatives. *Analytical Biochemistry* **33**, 143–157.

**Watanabe S, Matsumoto M, Hakomori Y, Takagi H, Shimada H, Sakamoto A.** 2014. The purine metabolite allantoin enhances abiotic stress tolerance through synergistic activation of abscisic acid metabolism. *Plant, Cell and Environment* **37**, 1022–1036.

**Wendler R, Carvalho PO, Pereira JS, Millard P.** 1995. Role of nitrogen remobilization from old leaves for new leaf growth of *Eucalyptus globulus* seedlings. *Tree Physiology* **15**, 679–83.

**Werner a. K, Medina-Escobar N, Zulawski M, Sparkes I a., Cao F-Q, Witte C-P.** 2013. The Ureide-Degrading Reactions of Purine Ring Catabolism Employ Three Amidohydrolases and One Aminohydrolase in *Arabidopsis*, Soybean, and Rice. *Plant Physiology* **163**, 672–681.

**Werner AK, Romeis T, Witte C-P.** 2010. Ureide catabolism in *Arabidopsis thaliana* and *Escherichia coli*. *Nature Chemical Biology* **6**, 19–21.

**Werner a. K, Sparkes I a., Romeis T, Witte C-P.** 2008. Identification, Biochemical Characterization, and Subcellular Localization of Allantoate Amidohydrolases from *Arabidopsis* and Soybean. *Plant Physiology* **146**, 418–430.

**Werner AK, Witte CP.** 2011. The biochemistry of nitrogen mobilization: Purine ring catabolism. *Trends in Plant Science* **16**, 381–387.

**Xu J, Zhang HY, Xie CH, Xue HW, Dijkhuis P, Liu CM.** 2005. EMBRYONIC FACTOR 1 encodes an AMP deaminase and is essential for the zygote to embryo transition in *Arabidopsis*. *Plant Journal* **42**, 743–756.

**Yeoh HH, Wee YC.** 1994. Leaf protein contents and nitrogen-to-protein conversion factors for 90 plant species. *Food Chemistry* **49**, 245–250.

**Yesbergenova Z, Yang G, Oron E, Soffer D, Fluhr R, Sagi M.** 2005. The plant Mo-hydroxylases aldehyde oxidase and xanthine dehydrogenase have distinct reactive oxygen species signatures and are induced by drought and abscisic acid. *Plant Journal* **42**, 862–876.

**Yoshino M, Murakami K, Tsushima K.** 1979. AMP deaminase from baker's yeast. Purification and some regulatory properties. *BBA - Enzymology* **570**, 157–166.

**Zrenner R, Stitt M, Sonnewald U, Boldt R.** 2006. Pyrimidine and purine biosynthesis and degradation in plants. *Annual review of plant biology* **57**, 805–836.

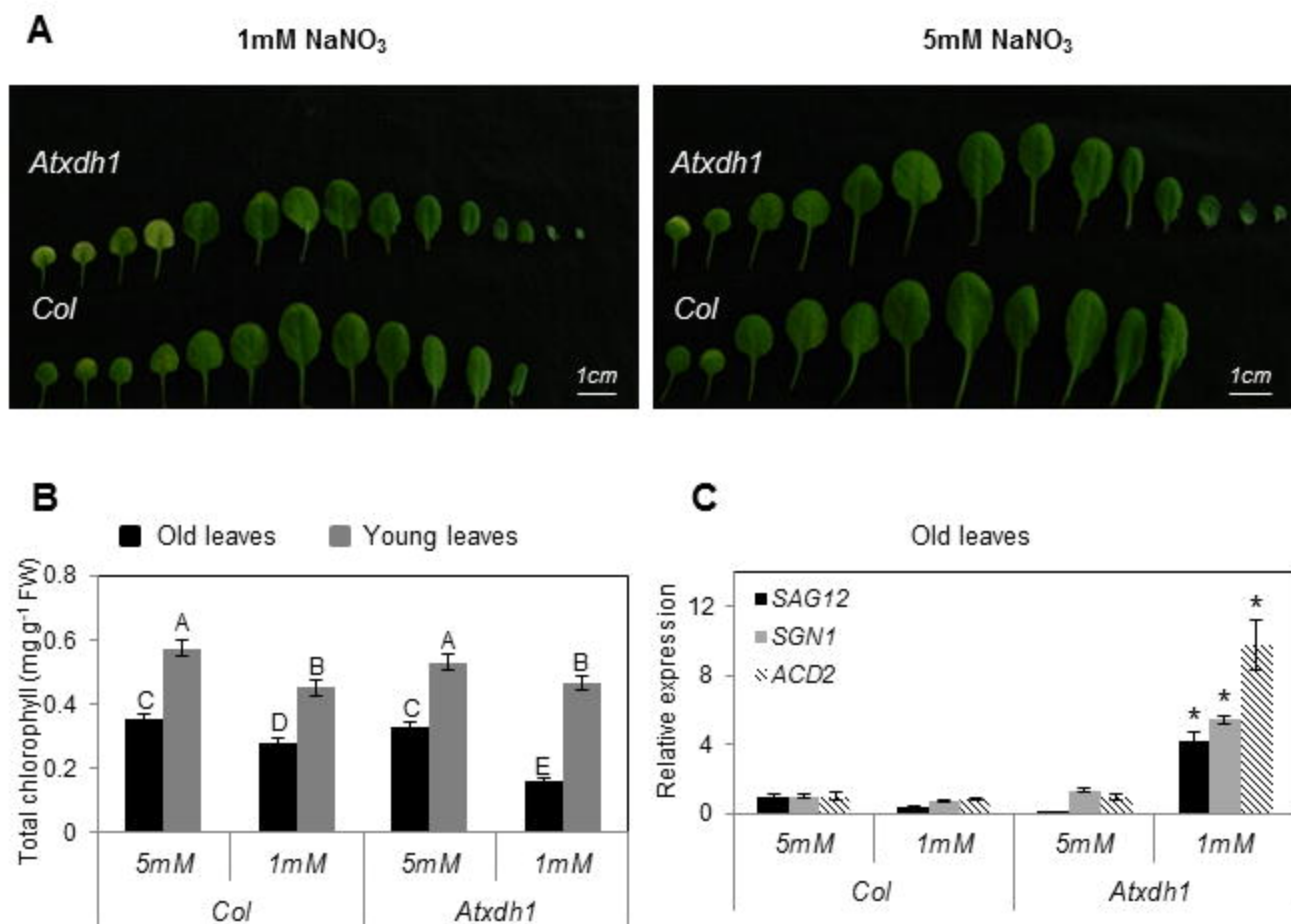

**Figure 1. Effects of different nitrate levels, supplemented to the growth medium of WT (Col) and *Atxdh1* mutant, on senescence symptoms in leaves.** Leaf appearance (A) from left to right is young to old where the first and last 4 leaves are designated 'young' and 'old', respectively. Total chlorophyll (B) content. Relative expression (C) of senescence marker transcripts in old leaves of *SAG12* (Suppressor of overexpression of Cys protease senescence-associated gene 12), *ACD2* (accelerated cell death2), *SGN1* (stay-green protein 1) (*At5G45890*, *At4G37000*, *At4G22920*, respectively). The data of chlorophyll content represent the mean obtained from a representative experiment from six independent biological replications. Values denoted by different letters are significantly different (Tukey-Kramer HSD test,  $P < 0.05$ ). The expression of each transcript was compared with the young leaves of WT in 5 mM nitrate treatment after normalization to *EF-1 $\alpha$*  transcript (*At5g60390*). Values marked with asterisk denotes significant difference (T-test,  $n=3$ ,  $P < 0.05$ ) between treatment and genotypes for each transcript and the data represent the mean obtained from 3 independent experiments. *Atxdh1* are SALK\_148366 and GABI\_049004 T-DNA mutants

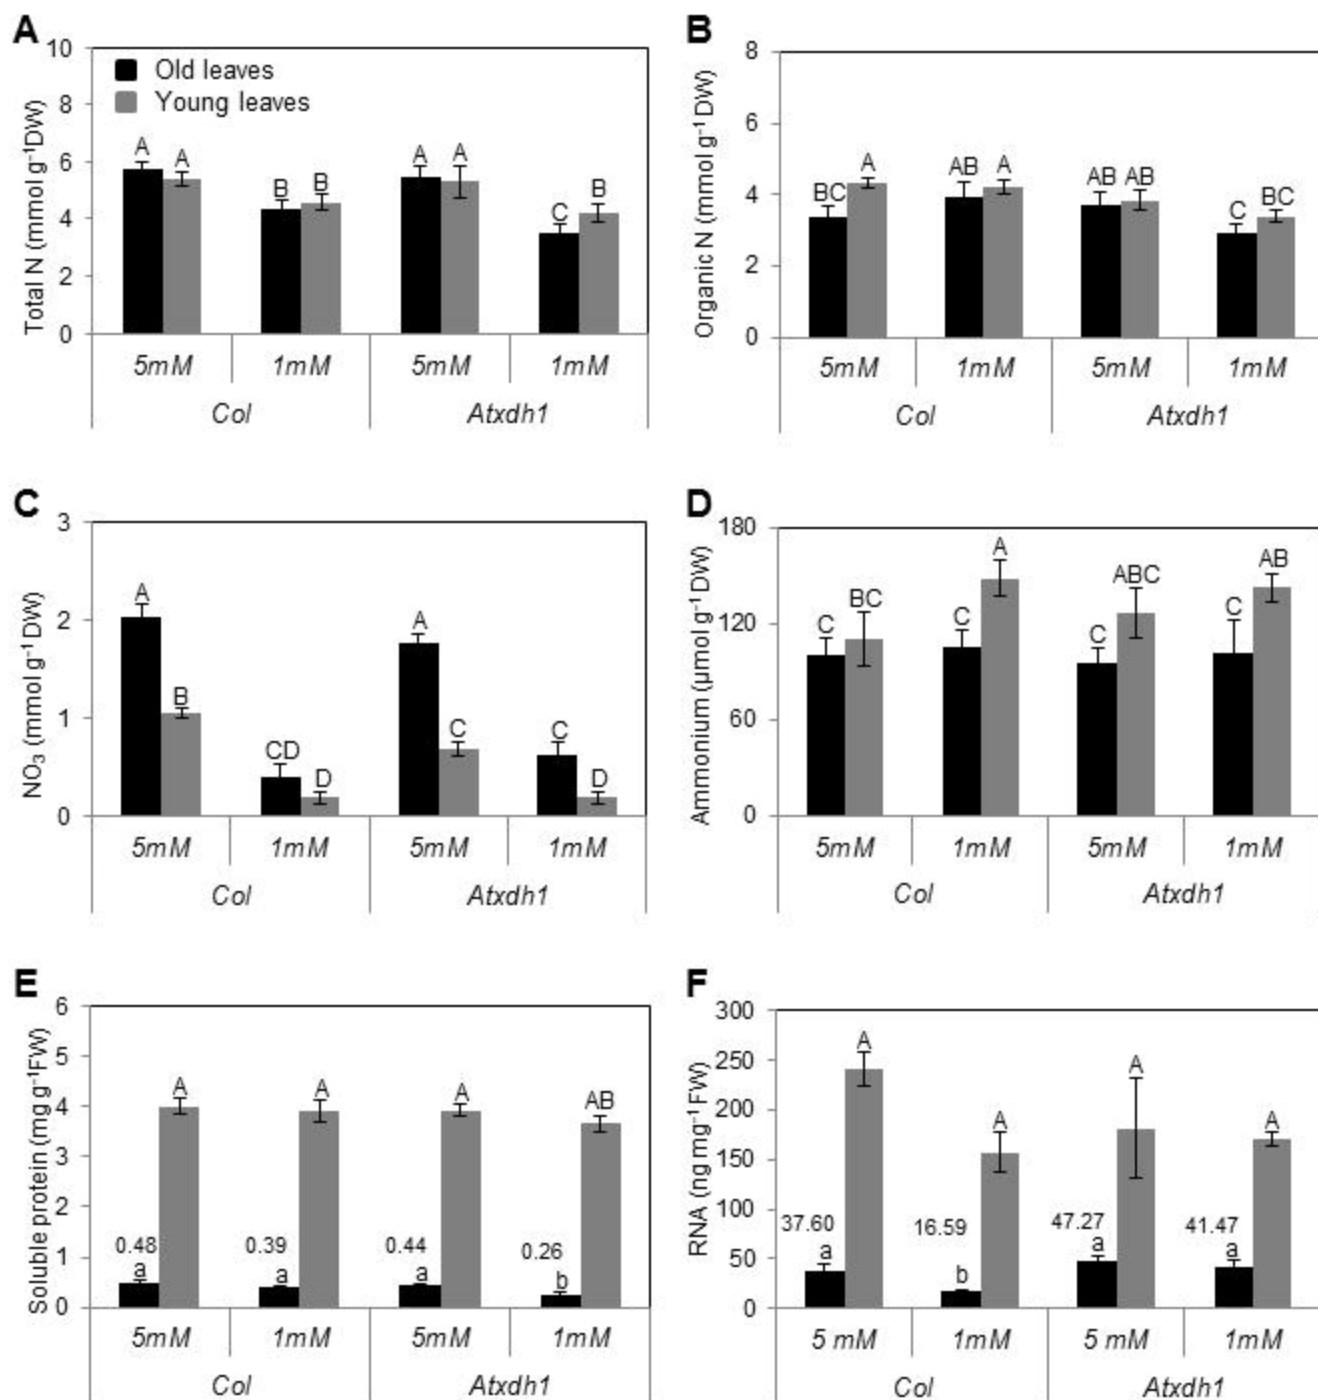

**Figure 2. Effects of different nitrate levels on total N (A), total organic N (B), nitrate (C), ammonium (D), soluble protein content (E) and total RNA content (F) in old and young leaves of WT (Col) and *Atxdh1* mutants.** Plants were grown until 25 days old in nitrogen deficient soil supplemented with one-half strength Hoagland nutrient solution supplemented with 1 or 5mM NaNO<sub>3</sub> as the only N source. The data represent the mean obtained from six independent experiments. The values denoted with different letters are significantly different according to the Tukey- Kramer HSD test, ( $P < 0.05$ ). Different upper case letters in inserts (A) to (D) indicate differences between treatments. Different capital letters in inserts (E) and (F) indicate differences between treated young leaves. Different lower case letters in inserts (E) and (F) indicate differences between treated old leaves. *Atxdh1* are SALK\_148366 and GABI\_049004 T-DNA mutants

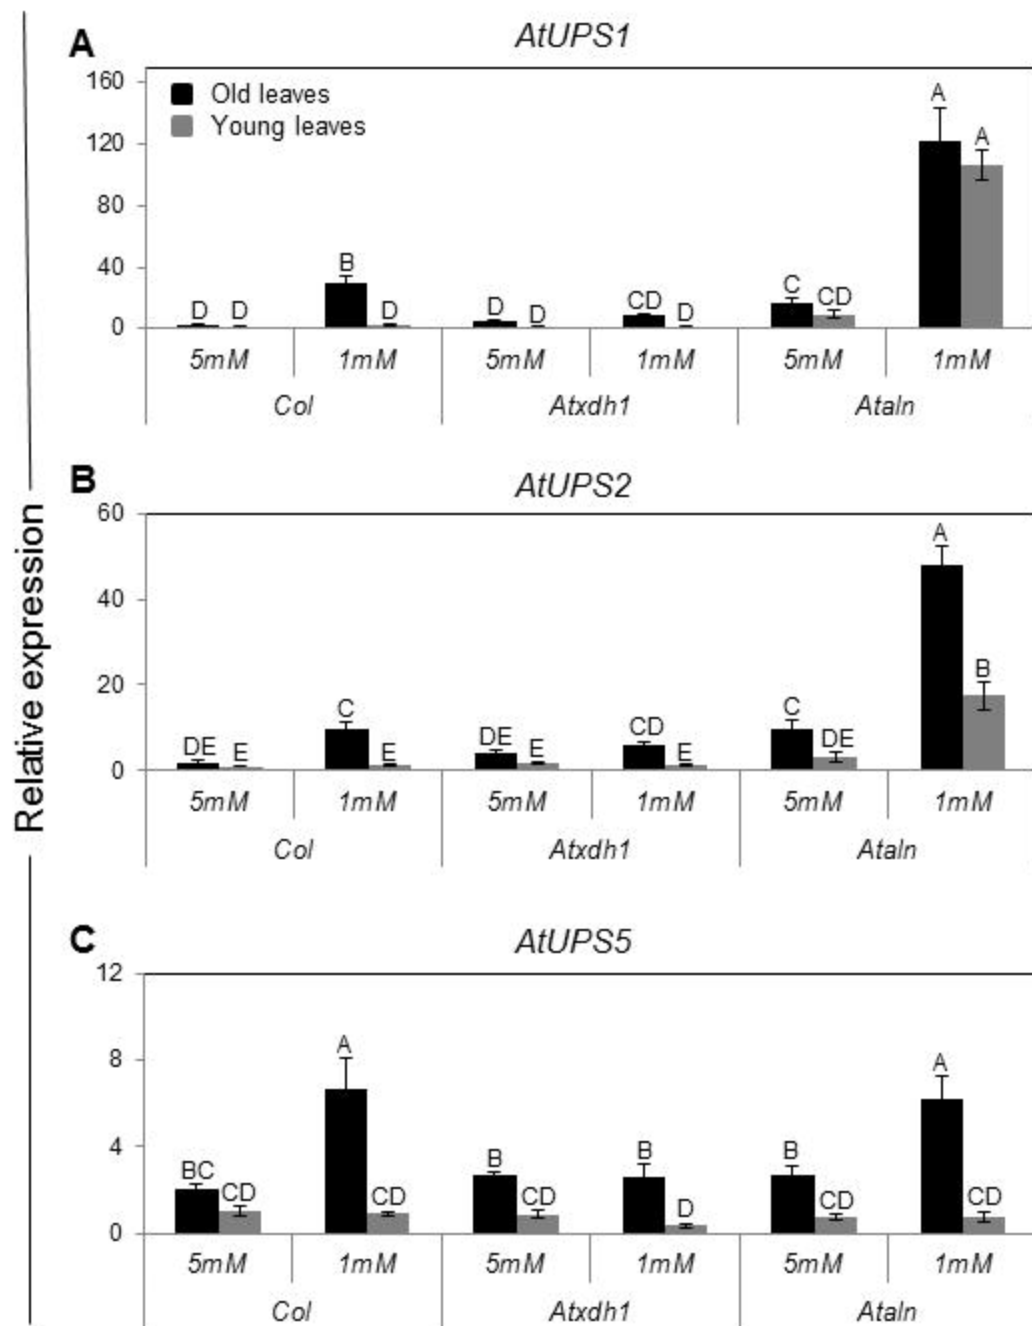

**Figure 3. Transcript expression levels of the ureide permeases, *AtUPS1*(A), *AtUPS2* (B) and *AtUPS5* (C), in old and young leaves of WT (Col), *Atxdh1* and *Ataln* mutants in response to nitrate level supplemented to the growth medium.** Quantitative analysis of transcripts by real-time RT-PCR was performed using 25 old plants grown on nitrogen deficient soil supplemented with 1 or 5mM NaNO<sub>3</sub> as the only N source. The expression of each treated line was compared with the young leaves of Col in 5mM nitrate treatment after normalization to *EF-1 $\alpha$*  transcript (At5g60390). The data represent the mean obtained from three independent experiments (Tukey-Kramer HSD test,  $P < 0.05$ ). *Atxdh1* and *Ataln* are SALK\_148366 and SALK\_013427 T-DNA mutants respectively.



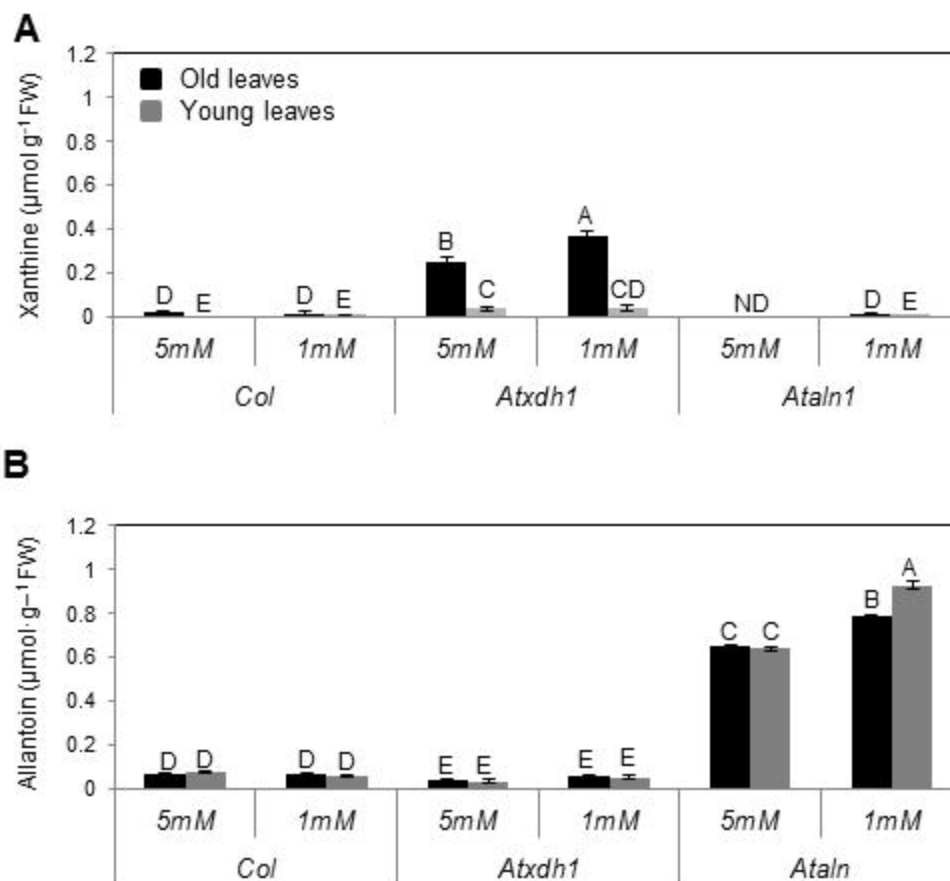

**Figure 4.** The levels of xanthine (A), allantoin (B) in old and young leaves of WT (*Col*), *Atxdh1*, *Ataln* mutants grown in nitrogen deficient soil supplemented with 1 or 5 mM NaNO<sub>3</sub>. ND- not detected. The data represent the mean obtained from one of 5 independent experiments with similar results. The values denoted with different letters are significantly different according to the Tukey-Kramer HSD test, ( $p < 0.05$ ). Different upper case letters indicate differences between mutants and WT plants. *Atxdh1* are SALK\_148366 and GABI\_049004, whereas *Ataln* are SALK\_013427 and SALK\_146783 T-DNA mutants.

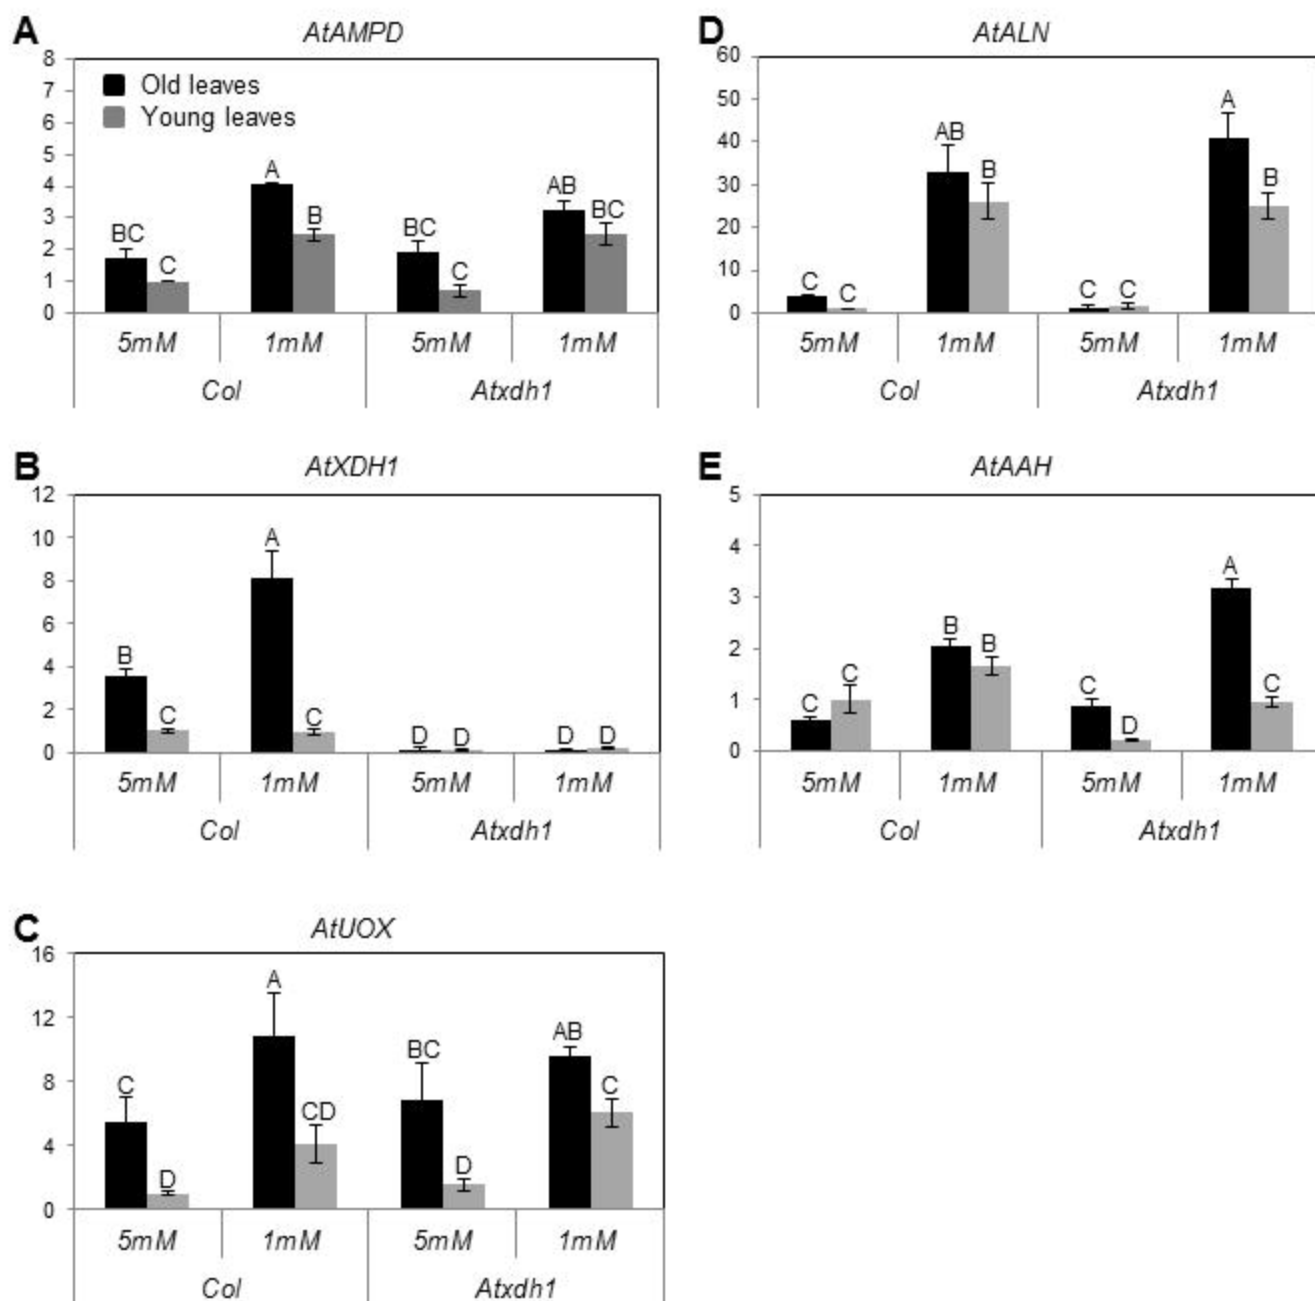

**Figure 5. Transcript expression of the purine catabolism genes in young and old leaves of WT and *Atxdh1* plants supplemented with 1 or 5mM nitrate as the only N source.** Adenosine 5'-monophosphate deaminase (*AtAMPD*) (A), xanthine dehydrogenase (*AtXDH*) (B), urate oxidase (*AtUOX*) (C), allantoinase (*AtALN*) (D) and allantoate amidinohydrolase (*AtAAH*) (E) were presented. Quantitative analysis of transcripts by real-time RT-PCR was performed using WT (Col) and *Atxdh1* (SALK\_148366, GABI\_049004) 25 days old plants grown on nitrogen deficient soil. The expression of each treated line was compared with the young leaves of WT in 5mM nitrate treatment after normalization to *EF-1 $\alpha$*  gene product (At5g60390). The data represent the mean obtained from three independent experiments. Values denoted by different letters are significantly different (Tukey-Kramer HSD test,  $P < 0.05$ ).

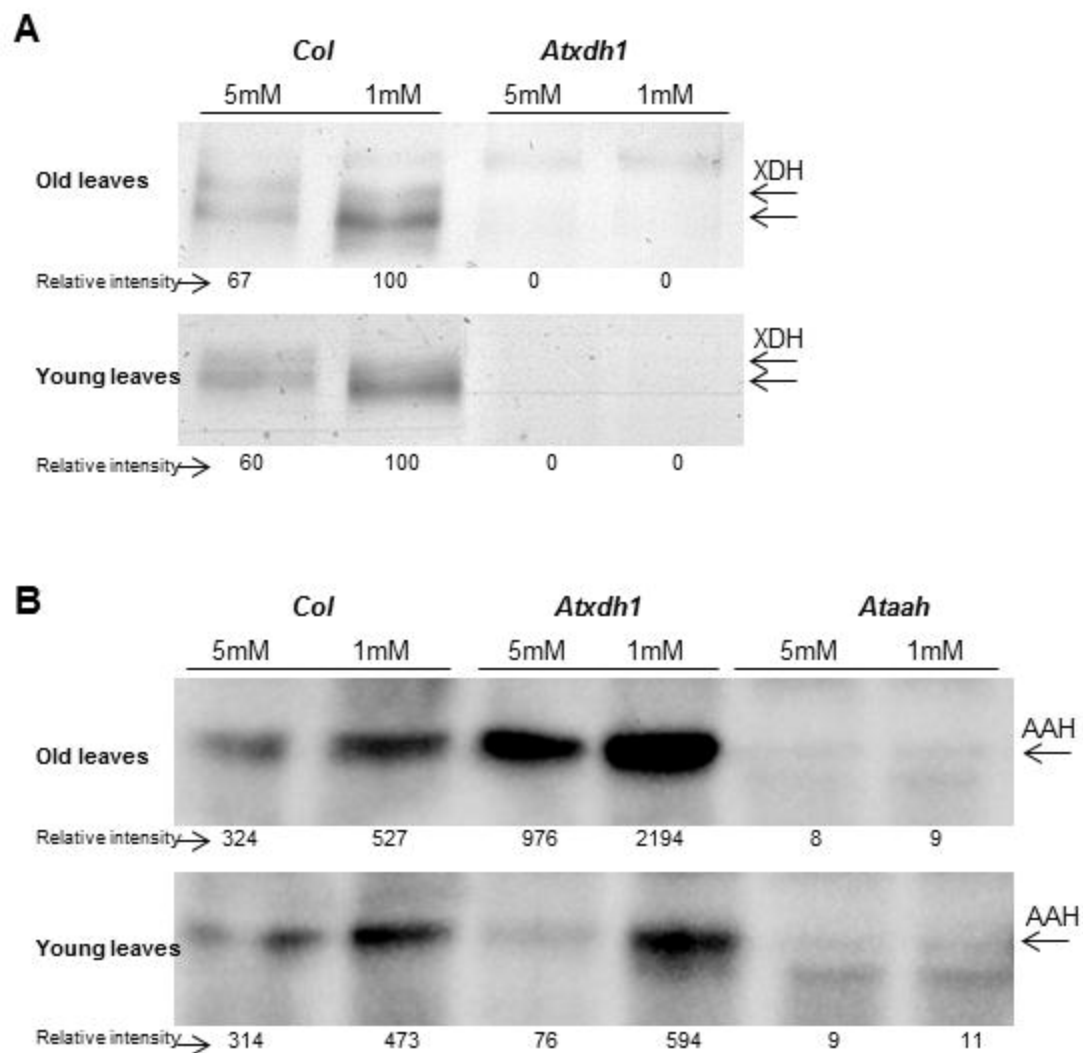

**Figure 6. The activity of xanthine dehydrogenase (XDH) (A) and immunoblot analysis of allantoin amidohydrolase (AAH) (B).** Protein extracted from old and young leaves of WT (*Col*) and *Atxdh1* mutant (SALK\_148366, GABI\_049004) grown on 1 mM or 5 mM nitrate as the only N source. The general activity of XDH in native-SDS PAGE gel was detected by using PMS as the electron-carrier intermediate and MTT as the electron acceptor. AAH protein level was analyzed by immunoblotting employing specific antiserum against AAH. Protein extracted from *Ataah* (SALK\_112631) mutant leaves was used as the negative control. For XDH activity 50 and 100  $\mu$ g crude protein extracts was loaded per each lane for the old and young leaves. For AAH analyses equal amount of 100  $\mu$ g crude protein extracts were loaded per each lane for old and young leaves respectively. The data represents one of three independent experiments with similar results.

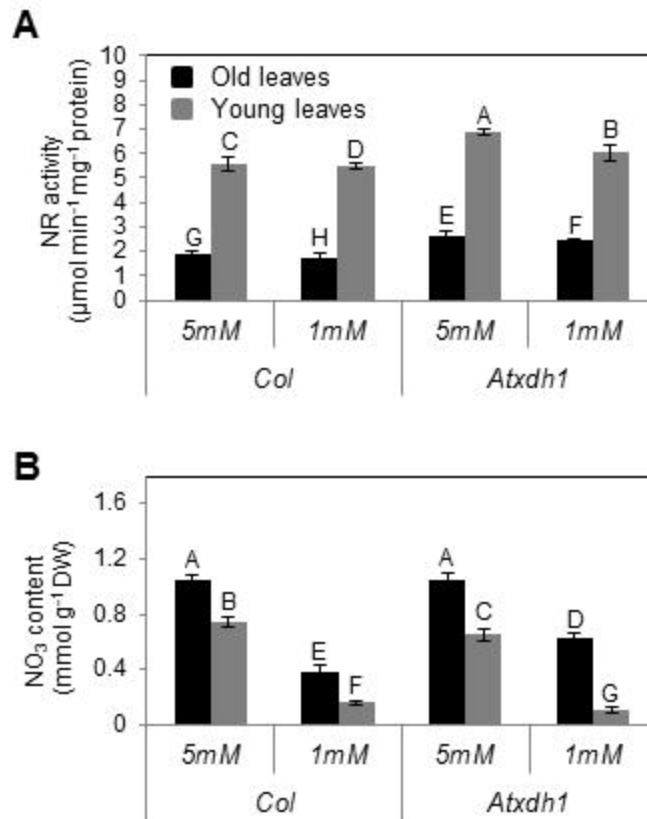

**Figure 7. Nitrate reductase activity (A) and nitrate content (B) in old and young leaves of WT (Col) and *Atxdh1* mutant as affected by nitrate level supplemented to the growth medium.** Eighteen days old plants grew in nitrogen deficient soil supplemented with one-half- Hoagland nutrient solution containing 1 or 5mM NaNO<sub>3</sub> as the only N source. The data represent the mean obtained from three independent experiments. Values denoted by different letters are significantly different (Tukey-Kramer HSD test, P < 0.05). *Atxdh1* are GABI\_049D04 and SALK\_148366 T-DNA mutants.
